# Supplementary material for: Synthesis of 1,3,4-oxadiazoles derivatives with antidepressant activity and their binding to the 5-HT1A receptor
Source: Royal Society of Chemistry journal article supplement (doi:10.1039/d0ra05886f), 2020-01-01
Supplement: d0ra05886f1.pdf [file d0ra05886f1.pdf]

## **Synthesis of 1,3,4-oxadiazole derivatives with antidepressant activity and their binding to the 5-HT<sub>1A</sub> receptor**

### **Forced swimming test (FST)**

Male Kun-Ming mice ( $22 \pm 2$  g) were used in the FSTs. On the test day, mice were assigned to different groups ( $n = 8$  for each group). The synthesized compounds and the standard drug fluoxetine were administered as intraperitoneal injections. Control animals received a 3% aqueous solution of Tween 80. After 30 min, the mice were dropped one at a time into a Plexiglas cylinder (height 25 cm, diameter 10 cm, containing water to a height of 10 cm at 23-25 °C) and observed for 6 min. After the first 2 min of vigorous struggling, the animals were immobile. A mouse was judged immobile if it floated in the water in an upright position and made only slight movements to prevent sinking. The total duration of immobility was recorded during the last 4 min of the 6-min test.

### **Tail suspension test (TST)**

Male mice were individually suspended by the tail above the floor and affixed with adhesive tape placed approximately 1-2 cm from the tip of the tail. The total duration of immobility was recorded in the last 6 min of a total period of 7 min. Mice were determined to be immobile when they were completely motionless and hung passively.

### **5-HT<sub>1A</sub> binding assay**

Cell membrane homogenates (10 µg protein) are incubated for 60 min at 22°C with 1 nM [<sup>3</sup>H]8-OH-DPAT in the absence or presence of the test compound in a buffer containing 50 mM Tris-HCl (pH 7.4), 10 mM MgSO<sub>4</sub>, 0.5 mM EDTA and 0.1% ascorbic acid. Nonspecific binding is determined in the presence of 10 µM 8-OH-DPAT. Following incubation, the samples are filtered rapidly under vacuum through glass fiber filters (GF/B, Packard) presoaked with 0.3% PEI and rinsed several times (200 ml) with ice-cold 50 mM Tris-HCl using a 96-sample cell harvester (Unifilter, Packard). The filter mates were dried at 37 °C in forced air fan incubator and then solid scintillator MeltiLex was melted on filter mates at 90 °C for 4 min. Radioactivity

was counted in MicroBeta2 scintillation counter (PerkinElmer). Data were fitted to a one-site curve-fitting equation with Prism 5 (GraphPad Software) and  $K_i$  values were estimated from the Cheng-Prusoff equation.

# <sup>1</sup>HNMR, <sup>13</sup>CNMR, HRMS and HPLC Spectra of Products

## 7-((5-(Butylthio)-1,3,4-oxadiazol-2-yl)methoxy)-3,4-dihydroquinolin-2(1H)-one (5a)

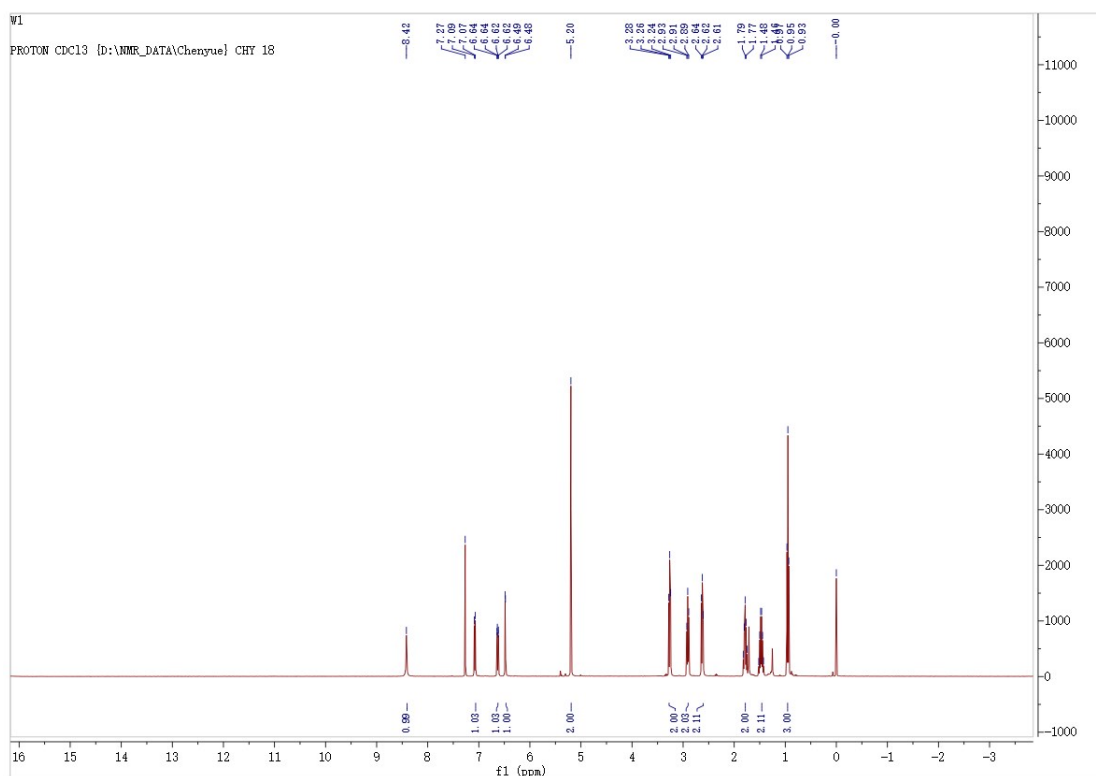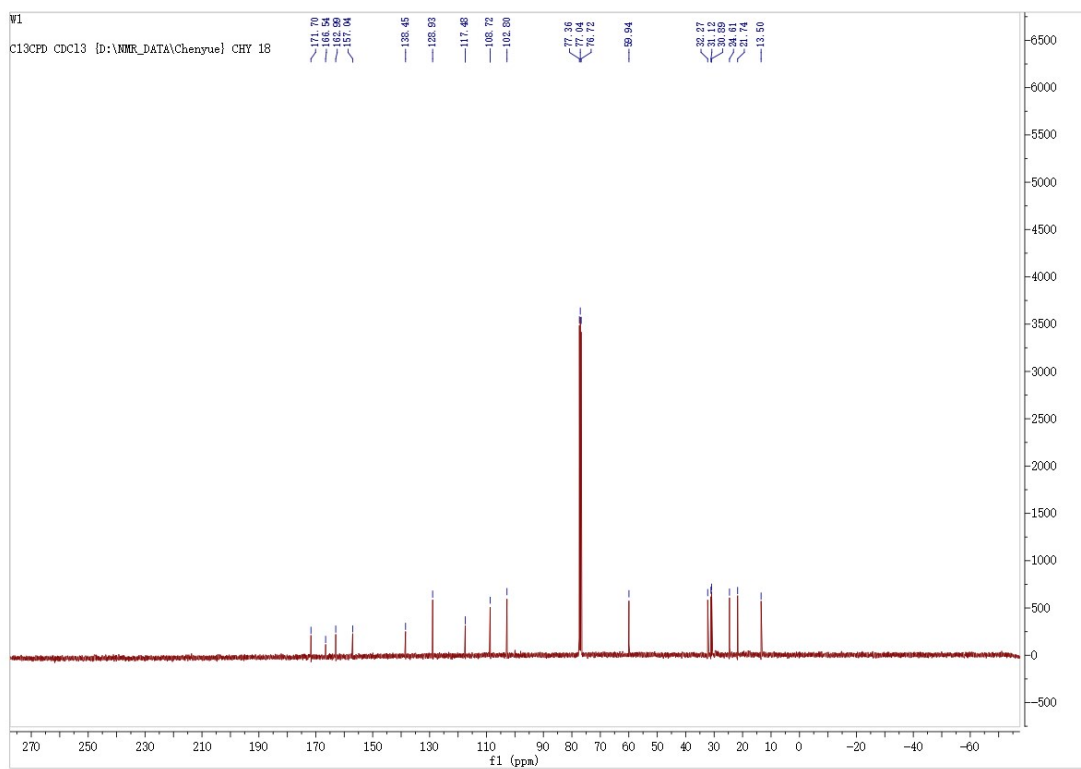

WSB-1 #29-31 RT: 0.13-0.14 AV: 3 SB: 74 0.59-0.91 NL: 4.98E8  
T: FTMS + p ESI Full ms [100.0000-1000.0000]

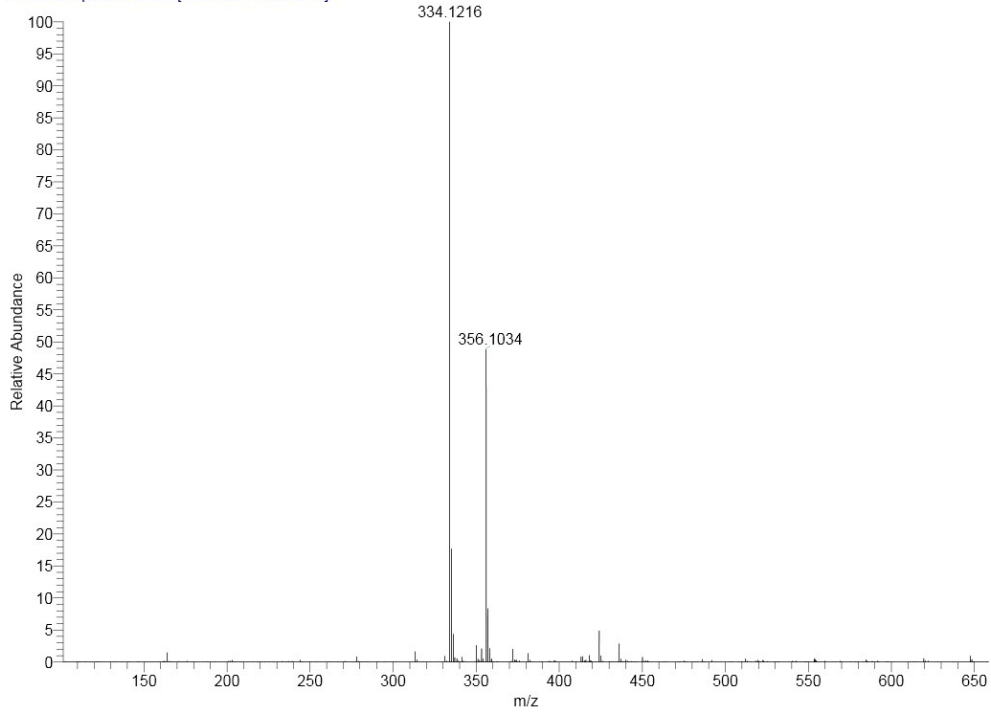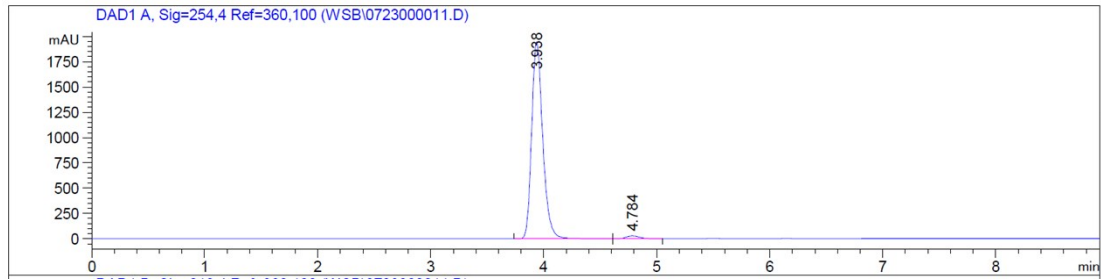

| 峰 # | 保留时间 [min] | 类型 | 峰宽 [min] | 峰面积 [mAU*s] | 峰高 [mAU]   | 峰面积 %   |
|-----|------------|----|----------|-------------|------------|---------|
| 1   | 3.938      | BV | 0.1032   | 1.32400e4   | 1949.43030 | 98.2037 |
| 2   | 4.784      | VV | 0.1221   | 242.17978   | 30.02106   | 1.7963  |

**7-((5-(Pentylthio)-1,3,4-oxadiazol-2-yl)methoxy)-3,4-dihydroquinolin-2(1H)-one (5b)**

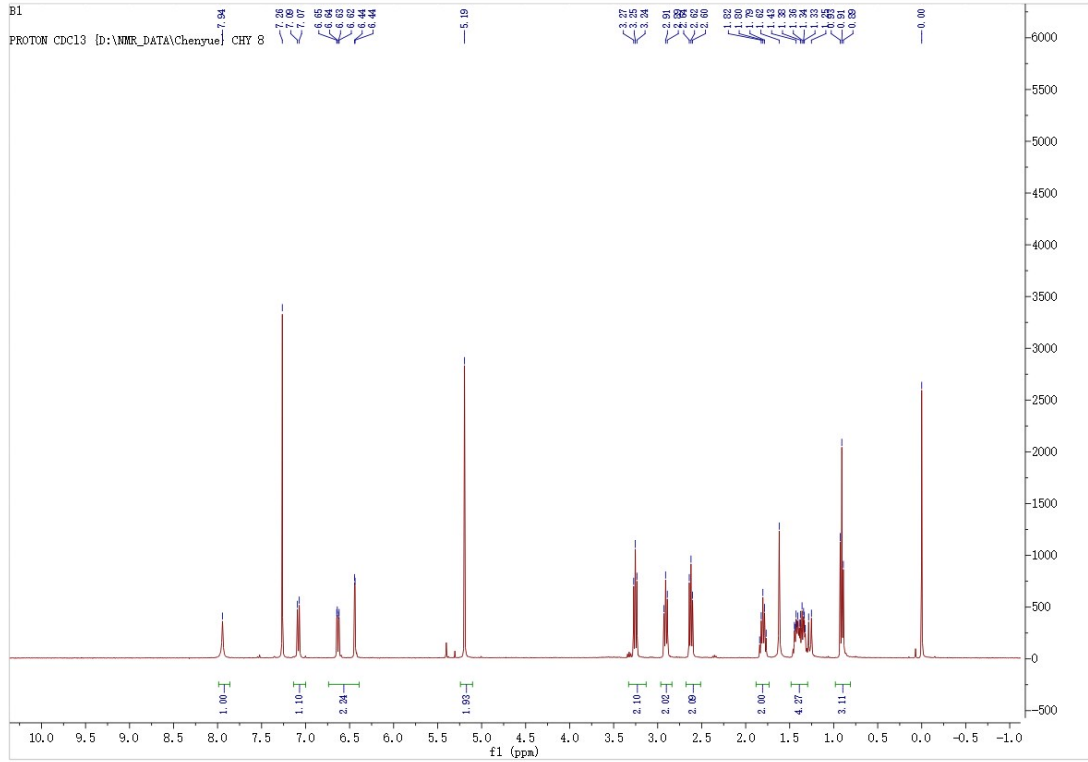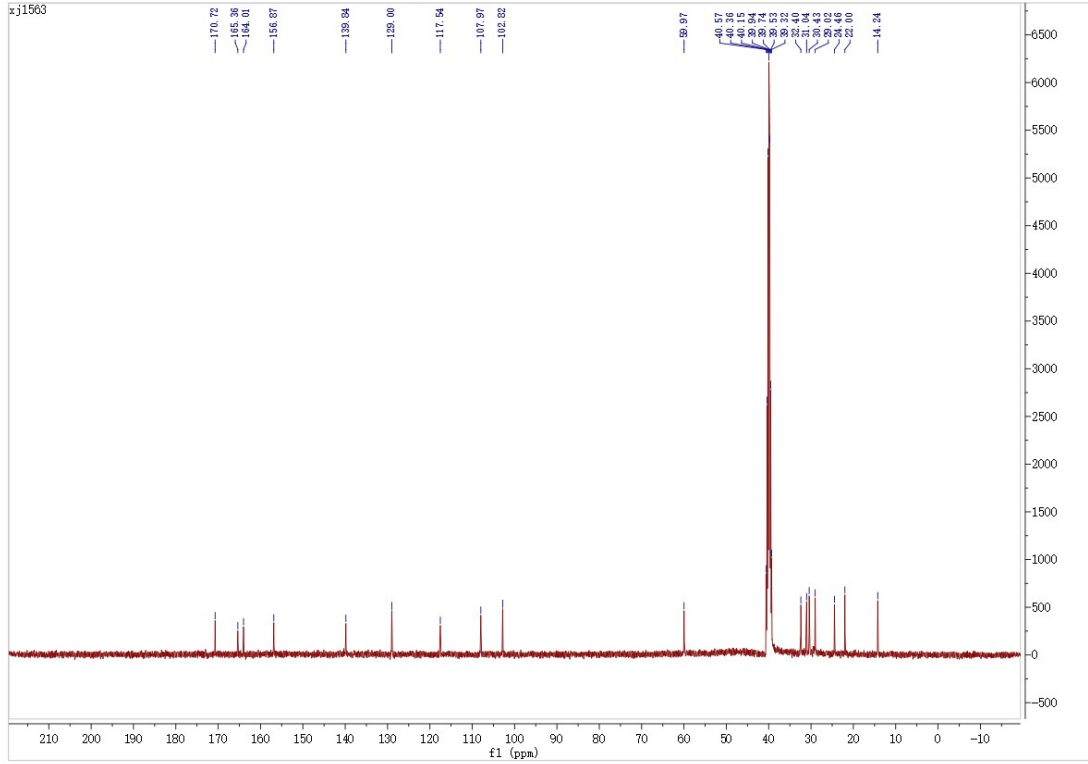

WSB-2 #27-29 RT: 0.12-0.13 AV: 3 SB: 48 0.77-0.98 NL: 6.78E8  
 T: FTMS + p ESI Full ms [100.0000-1000.0000]

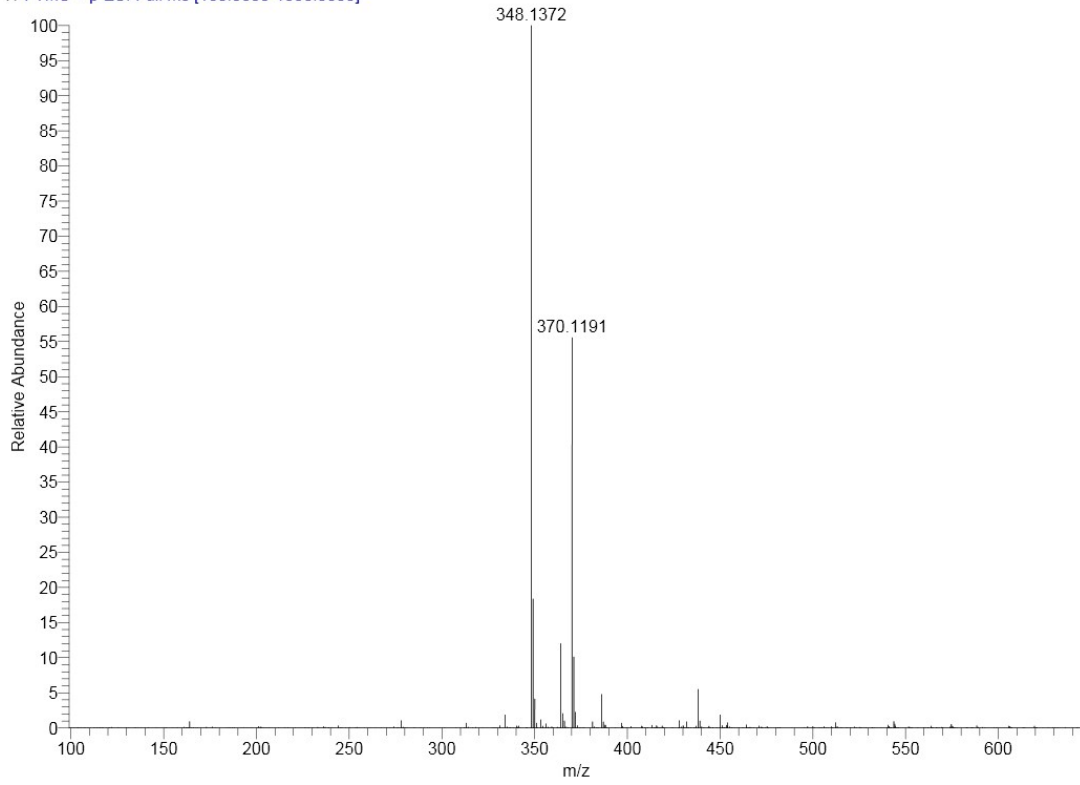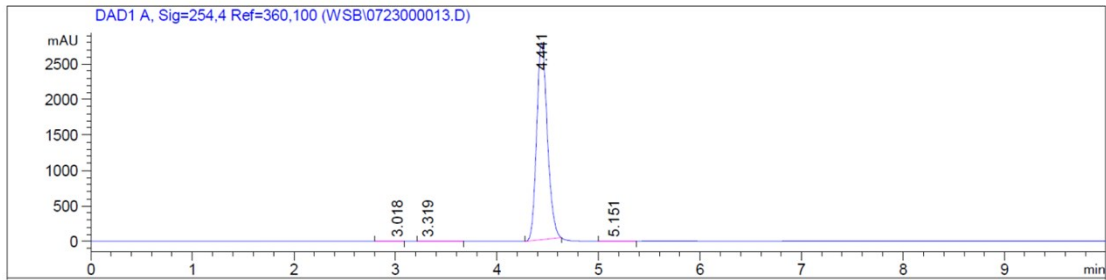

| 峰 # | 保留时间 [min] | 类型  | 峰宽 [min] | 峰面积 [mAU*s] | 峰高 [mAU]   | 峰面积 %   |
|-----|------------|-----|----------|-------------|------------|---------|
| 1   | 3.018      | BV  | 0.0795   | 6.35668     | 1.24644    | 0.0311  |
| 2   | 3.319      | VB  | 0.1090   | 16.67444    | 2.23595    | 0.0816  |
| 3   | 4.441      | BBA | 0.1156   | 2.03934e4   | 2778.36377 | 99.7664 |
| 4   | 5.151      | BH  | 0.1410   | 24.72833    | 2.60013    | 0.1210  |

# 7-((5-(Hexylthio)-1,3,4-oxadiazol-2-yl)methoxy)-3,4-dihydroquinolin-2(1H)-one (5c)

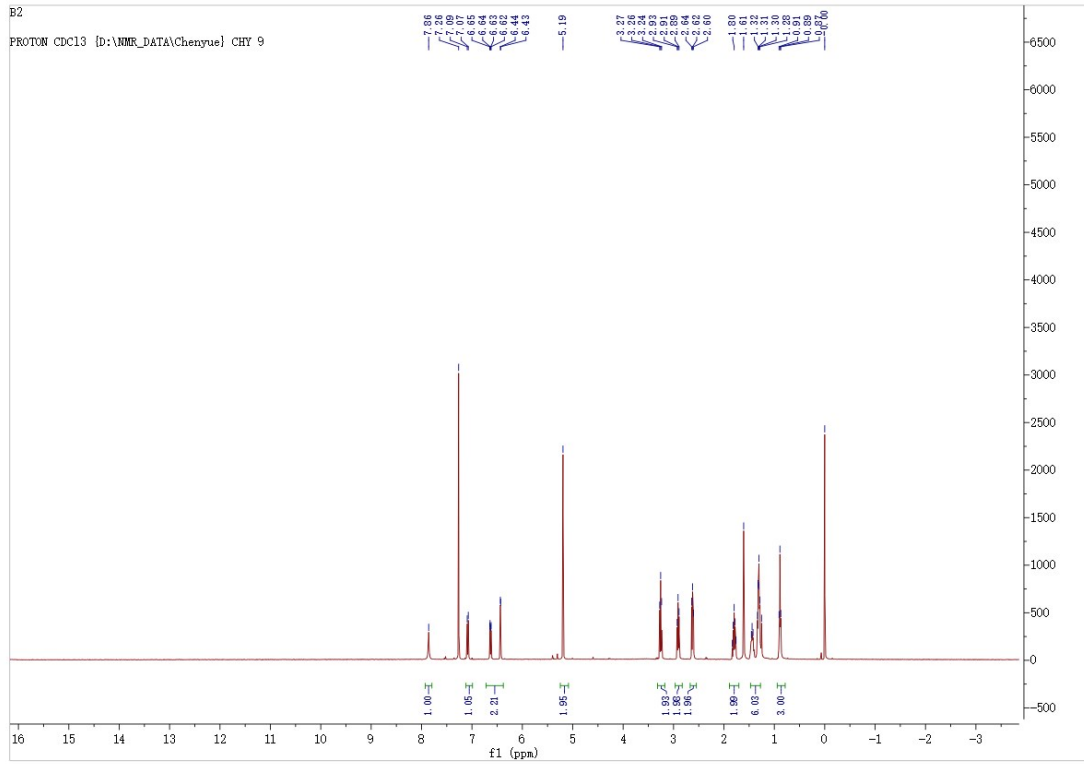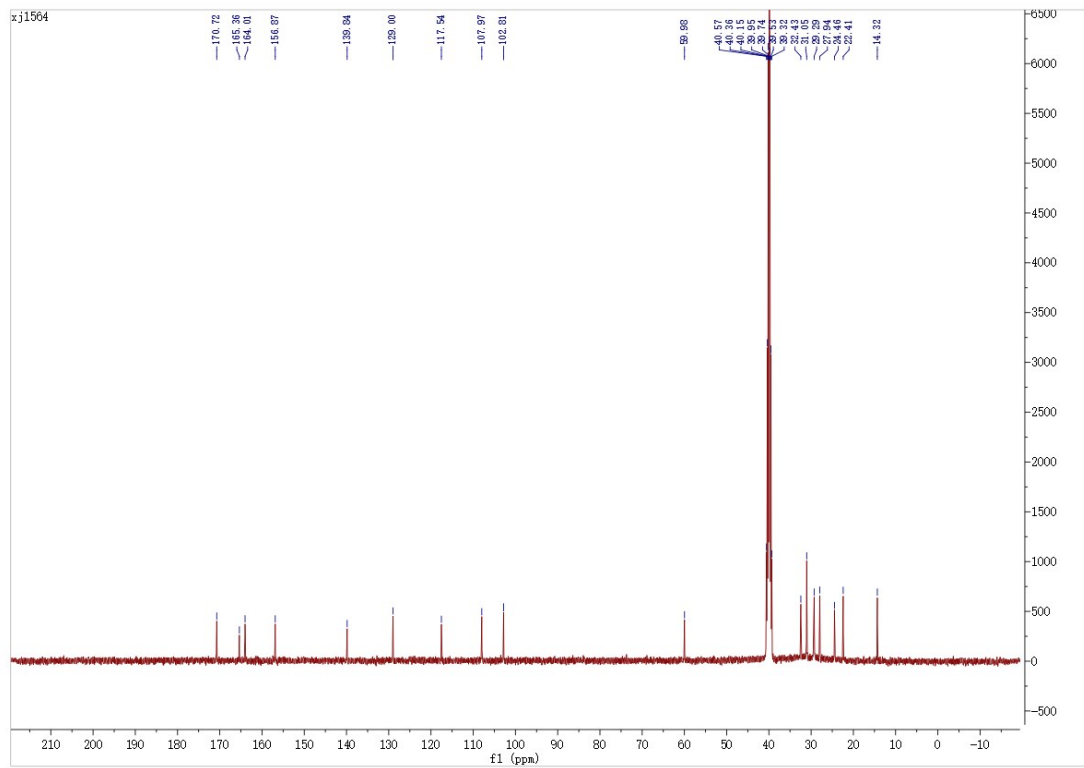

WSB-3 #26-29 RT: 0.12-0.13 AV: 4 SB: 37 0.53-0.69 NL: 4.40E8  
 T: FTMS + p ESI Full ms [100.0000-1000.0000]

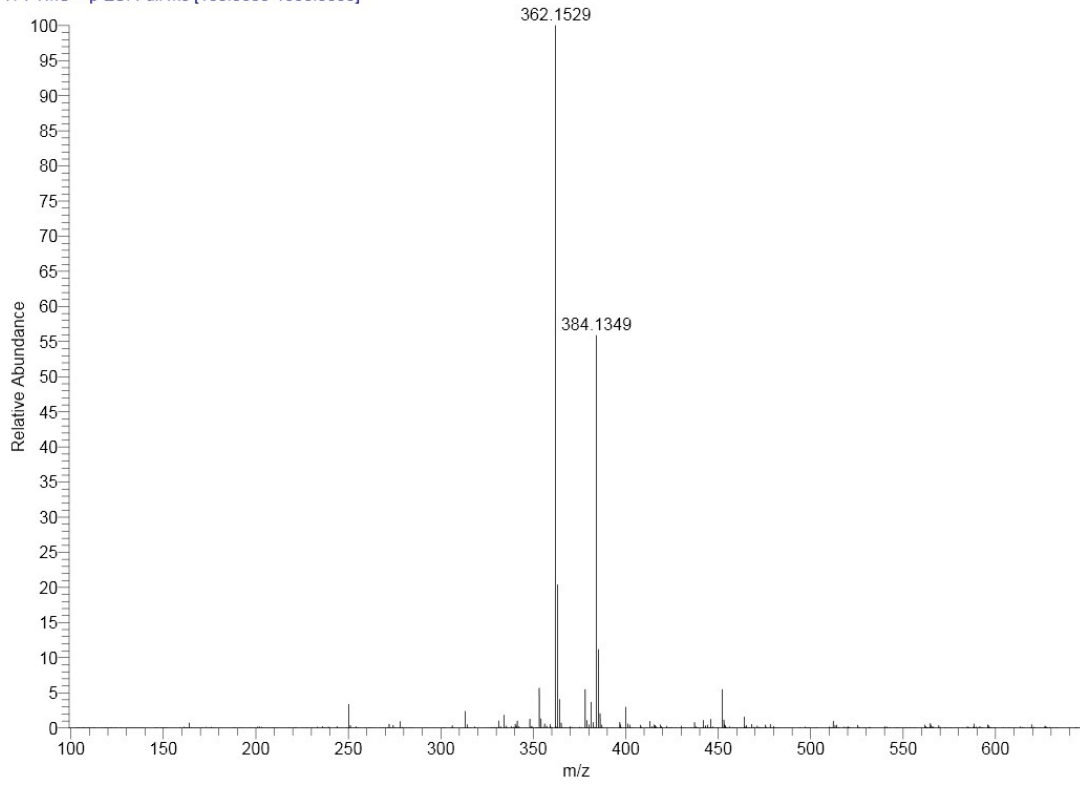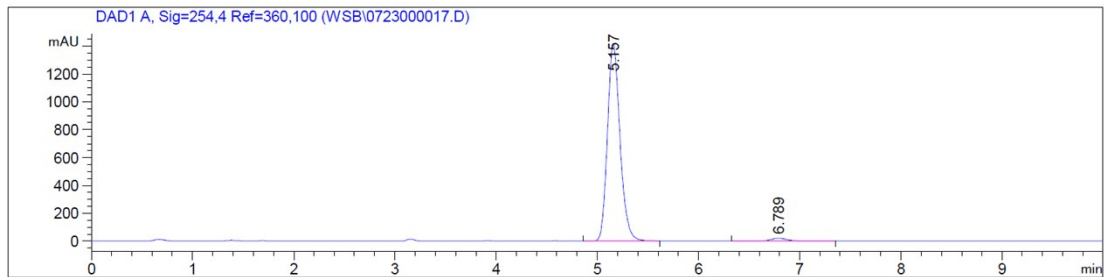

| 峰 # | 保留时间 [min] | 类型  | 峰宽 [min] | 峰面积 [mAU*s] | 峰高 [mAU]   | 峰面积 %   |
|-----|------------|-----|----------|-------------|------------|---------|
| 1   | 5.157      | HHA | 0.1325   | 1.22567e4   | 1422.35437 | 98.1127 |
| 2   | 6.789      | HB  | 0.1717   | 235.76608   | 21.20602   | 1.8873  |



7-((5-(Heptylthio)-1,3,4-oxadiazol-2-yl)methoxy)-3,4-dihydroquinolin-2(1H)-one (5d)

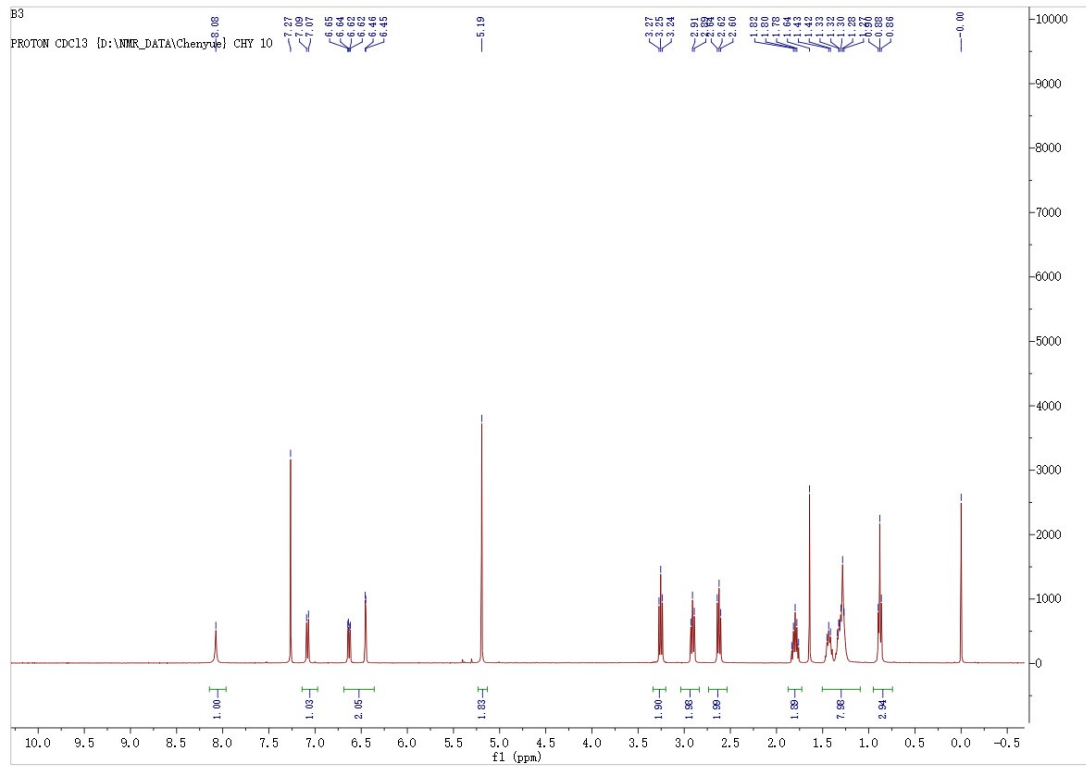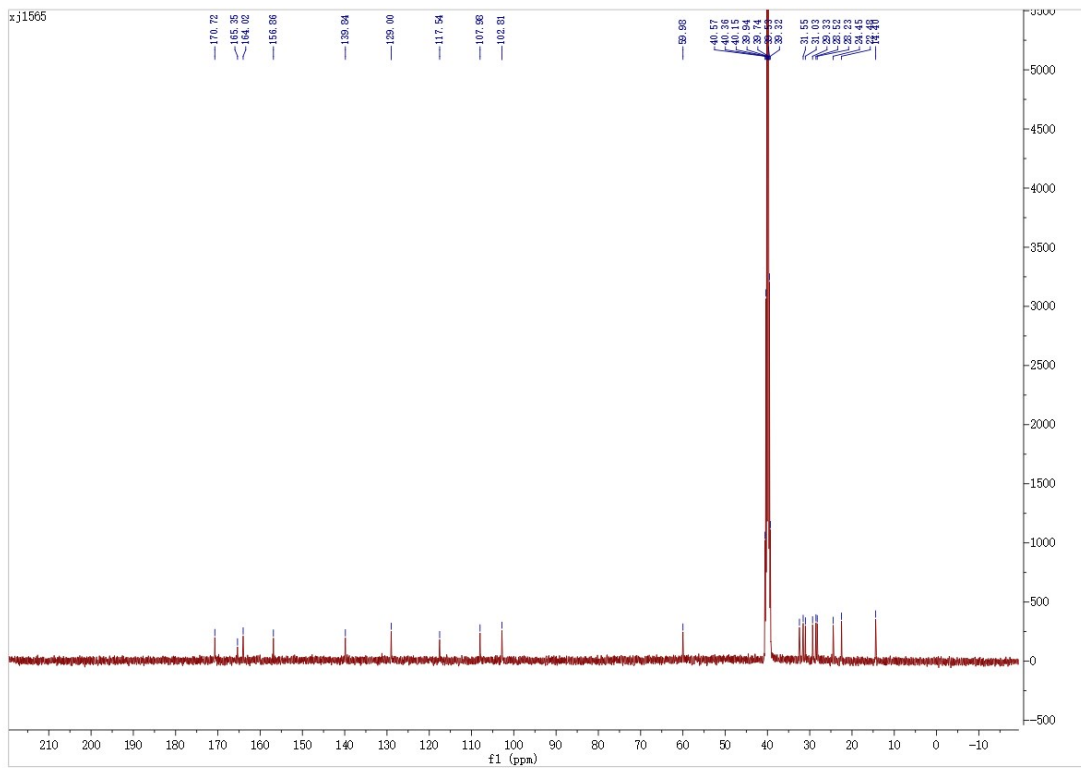

WSB-4 #28-30 RT: 0.13-0.14 AV: 3 NL: 3.87E8  
 T: FTMS + p ESI Full ms [100.0000-1000.0000]

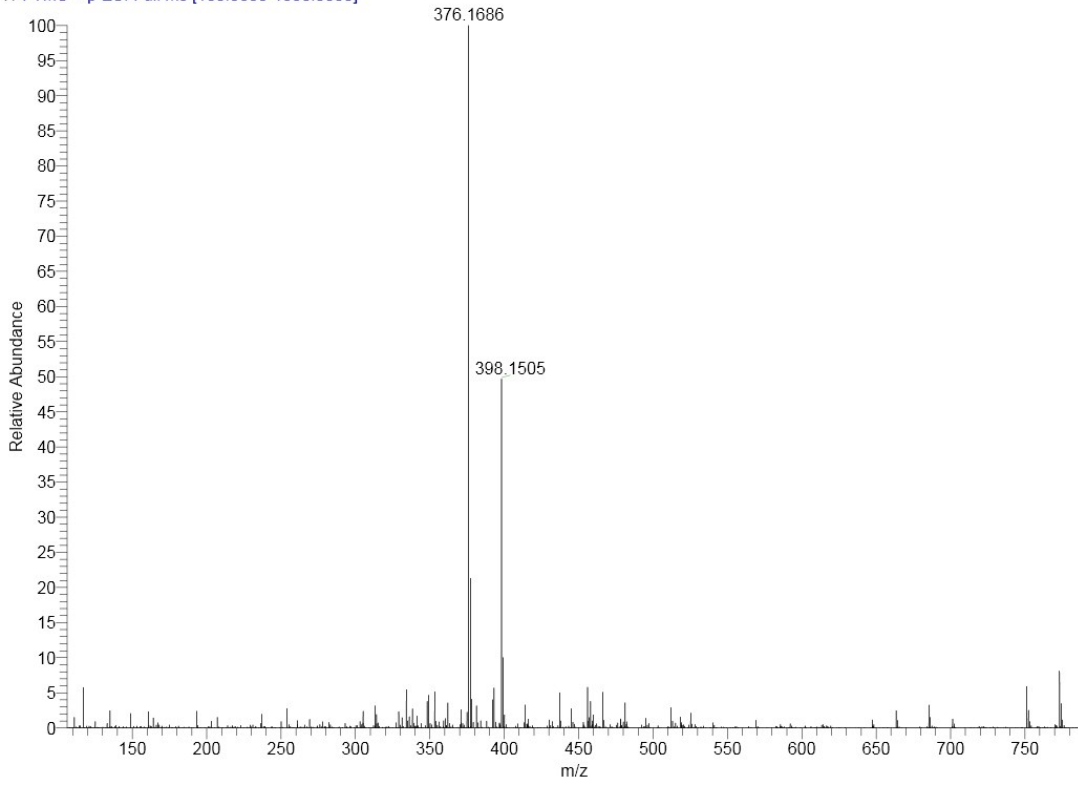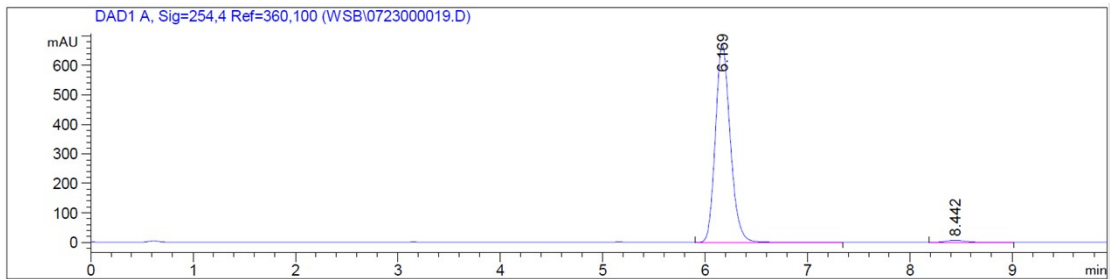

| 峰 # | 保留时间 [min] | 类型 | 峰宽 [min] | 峰面积 [mAU*s] | 峰高 [mAU]  | 峰面积 %   |
|-----|------------|----|----------|-------------|-----------|---------|
| 1   | 6.169      | BB | 0.1550   | 6770.88232  | 674.97656 | 98.6861 |
| 2   | 8.442      | HB | 0.2053   | 90.14445    | 6.77200   | 1.3139  |

7-((5-(Benzylthio)-1,3,4-oxadiazol-2-yl)methoxy)-3,4-dihydroquinolin-2(1H)-one (5c)

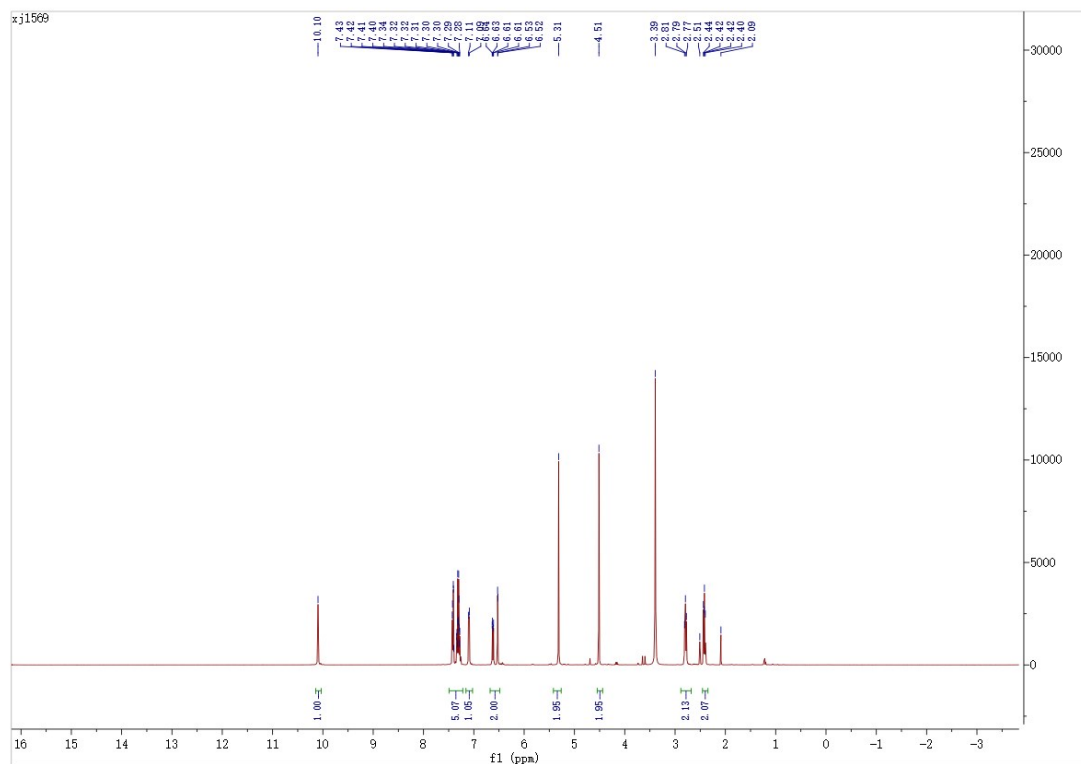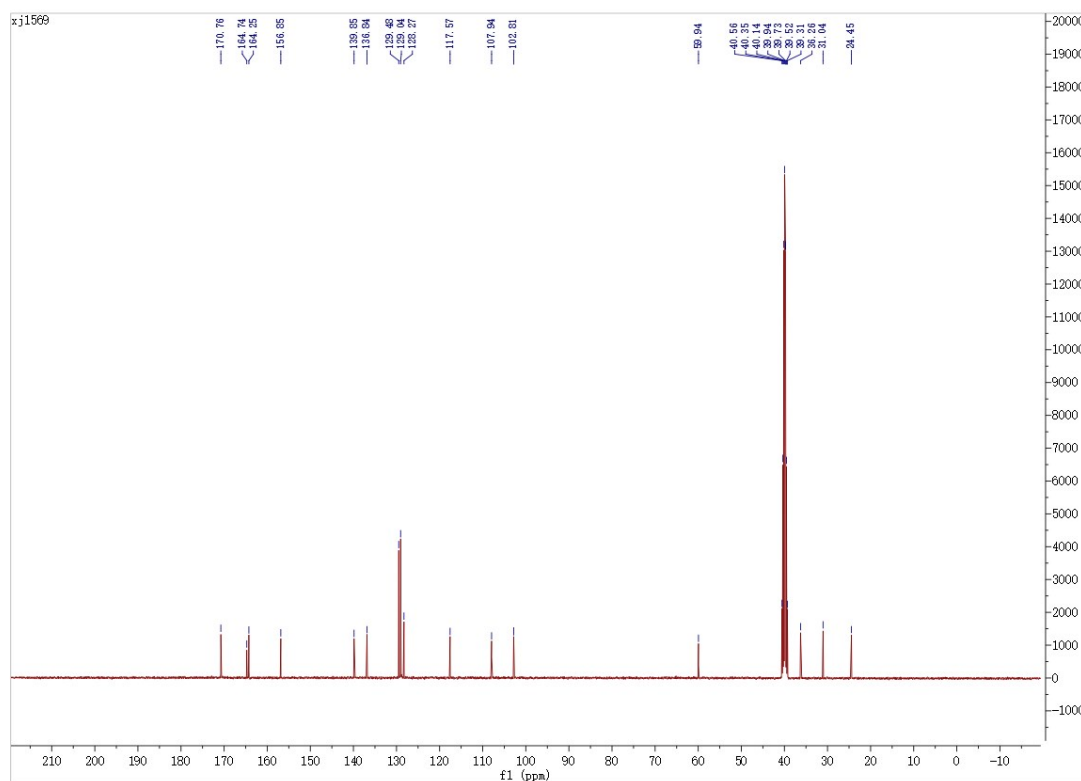

WSB-5 #26-28 RT: 0.12-0.13 AV: 3 SB: 25 0.63-0.73 NL: 2.17E8  
T: FTMS + p ESI Full ms [100.0000-1000.0000]

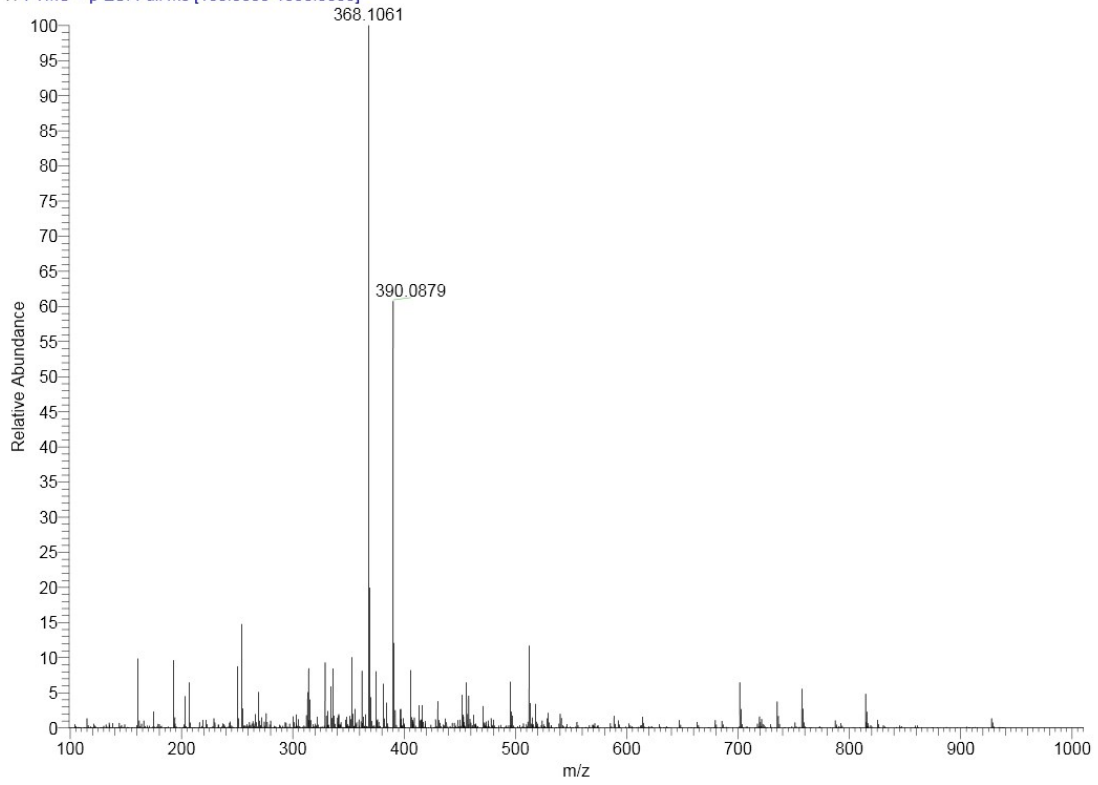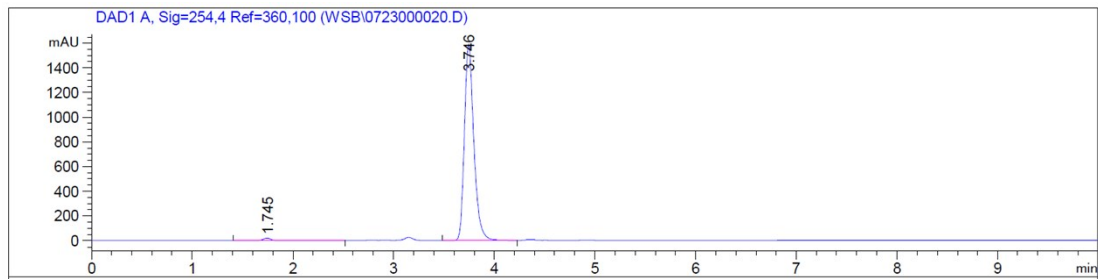

| 峰 # | 保留时间 [min] | 类型 | 峰宽 [min] | 峰面积 [mAU*s] | 峰高 [mAU]   | 峰面积 %   |
|-----|------------|----|----------|-------------|------------|---------|
| 1   | 1.745      | BB | 0.0835   | 112.76347   | 20.73288   | 1.0790  |
| 2   | 3.746      | BB | 0.0998   | 1.03376e4   | 1592.00708 | 98.9210 |

7-((5-((4-Fluorobenzyl)thio)-1,3,4-oxadiazol-2-yl)methoxy)-3,4-dihydroquinolin-2(1H)-one (5f)

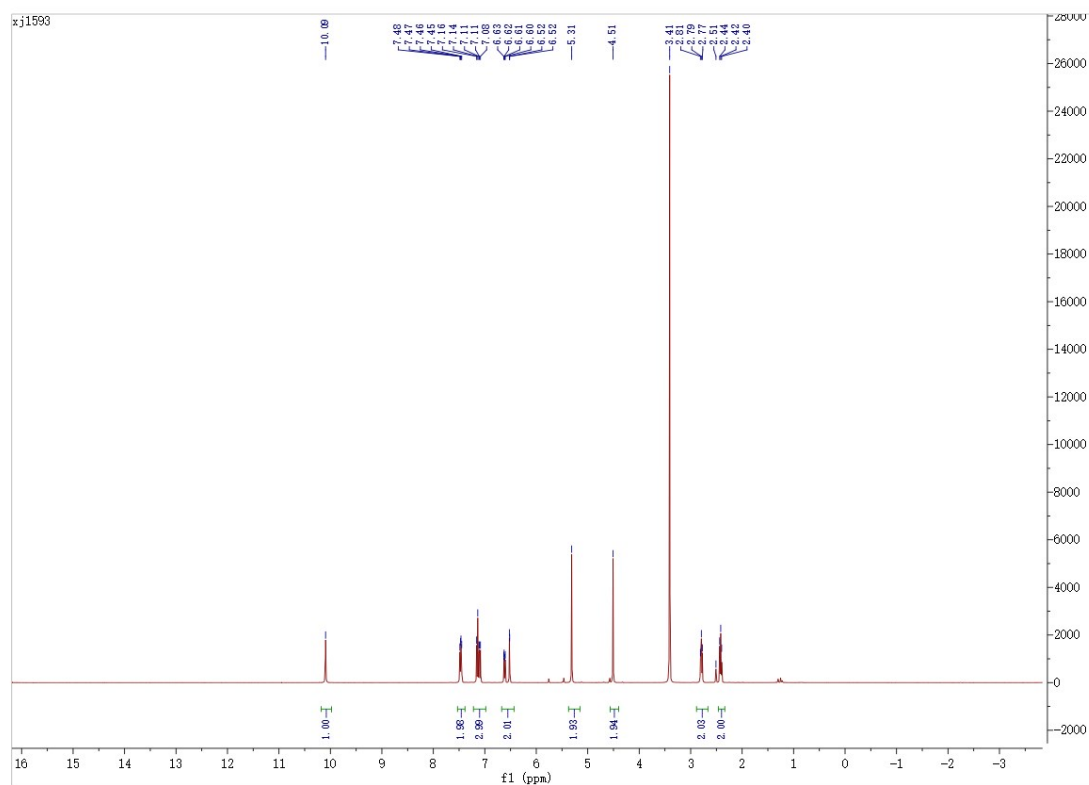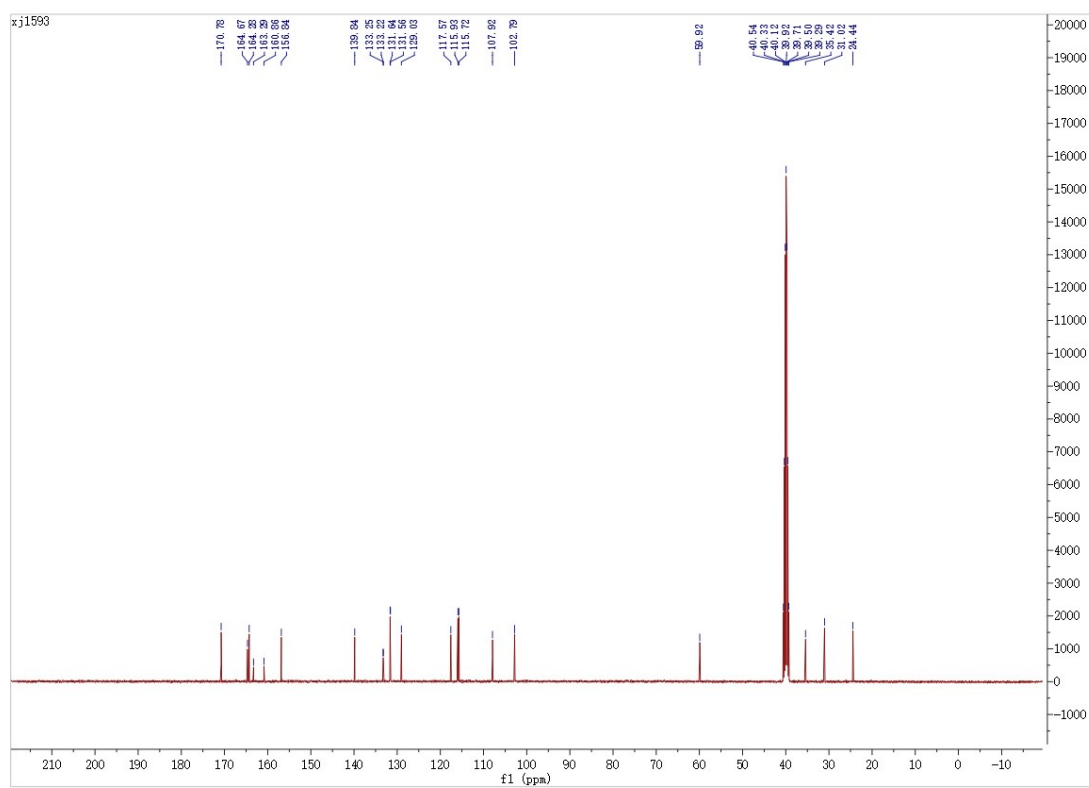

WSB-6 #27-30 RT: 0.12-0.14 AV: 4 NL: 4.80E8  
 T: FTMS + p ESI Full ms [100.0000-1000.0000]

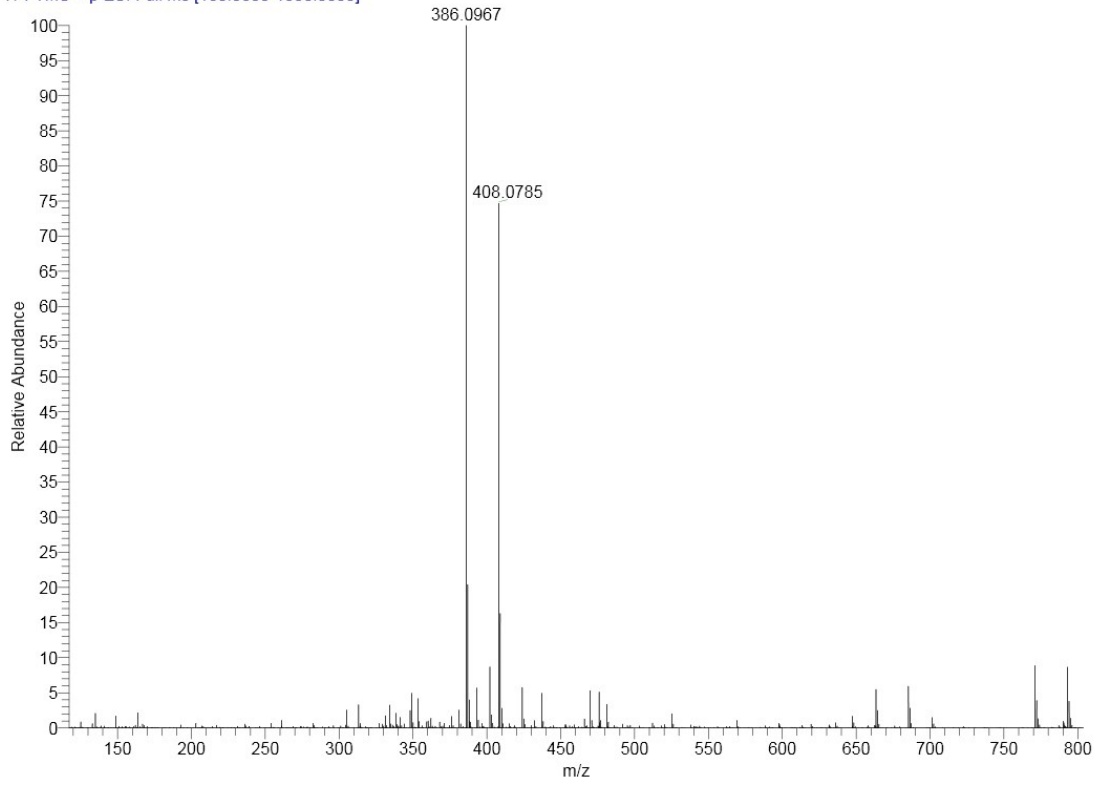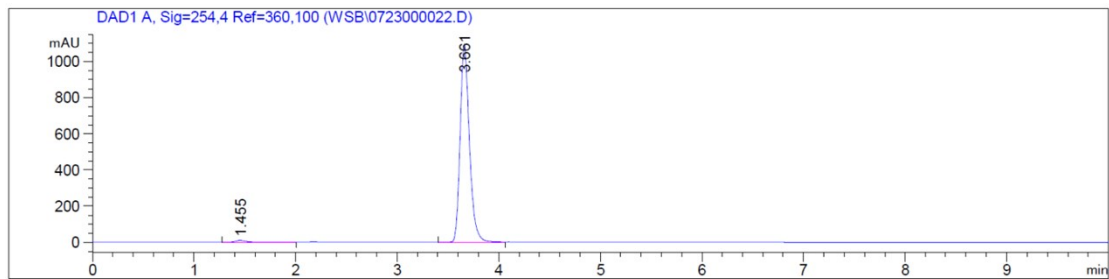

| 峰 # | 保留时间 [min] | 类型 | 峰宽 [min] | 峰面积 [mAU*s] | 峰高 [mAU]   | 峰面积 %   |
|-----|------------|----|----------|-------------|------------|---------|
| 1   | 1.455      | BB | 0.1173   | 77.38702    | 9.88971    | 1.1020  |
| 2   | 3.661      | BV | 0.0960   | 6944.82080  | 1095.42737 | 98.8980 |

7-((5-((4-Chlorobenzyl)thio)-1,3,4-oxadiazol-2-yl)methoxy)-3,4-dihydroquinolin-2(1H)-one (5g)

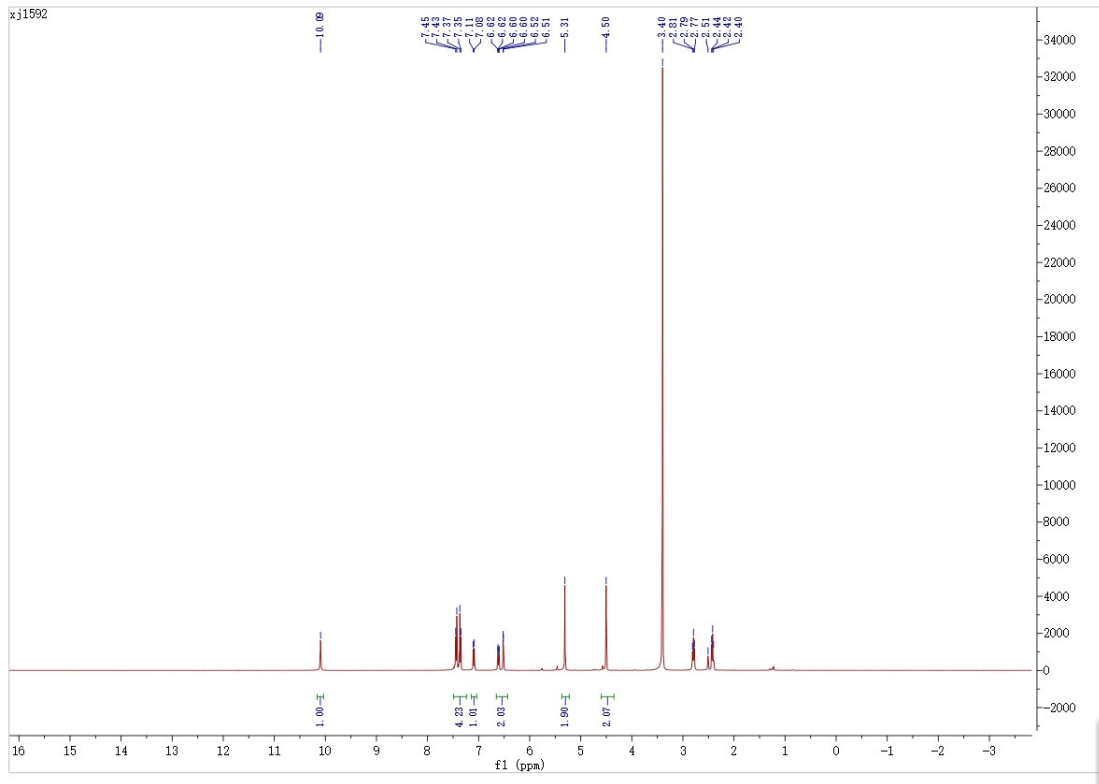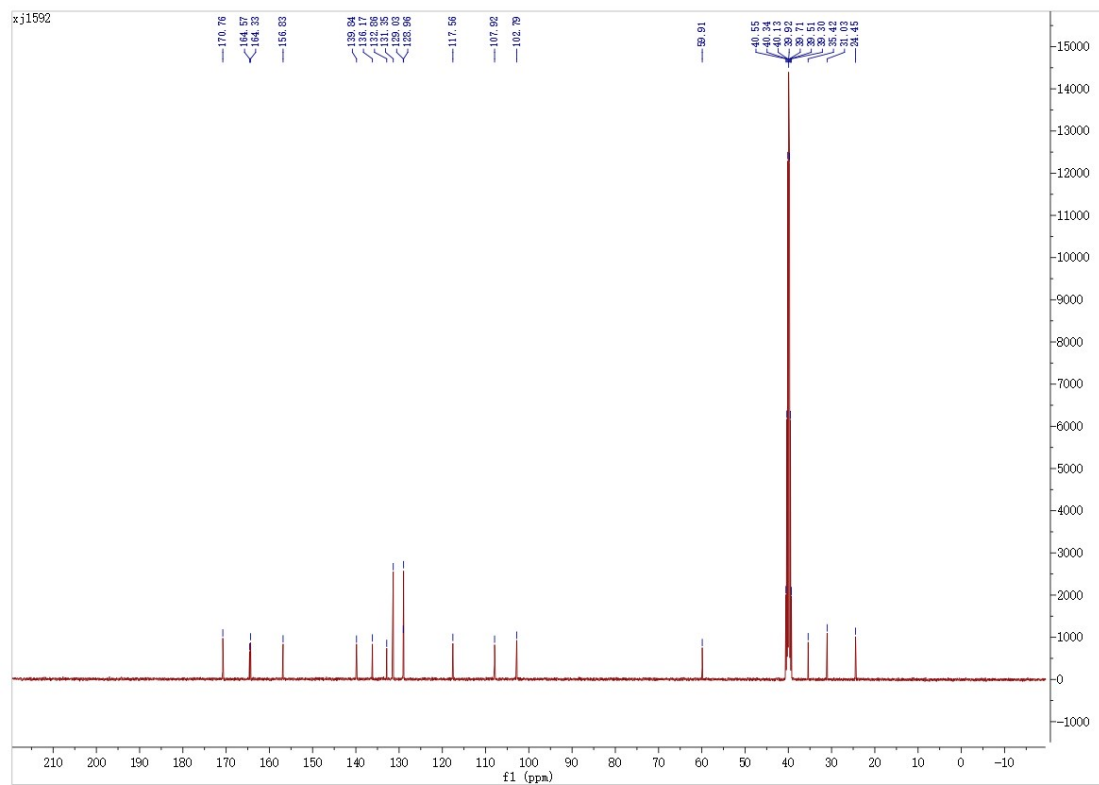

WSB-7 #20-22 RT: 0.10-0.10 AV: 3 NL: 4.29E8  
 T: FTMS + p ESI Full ms [100.0000-1000.0000]

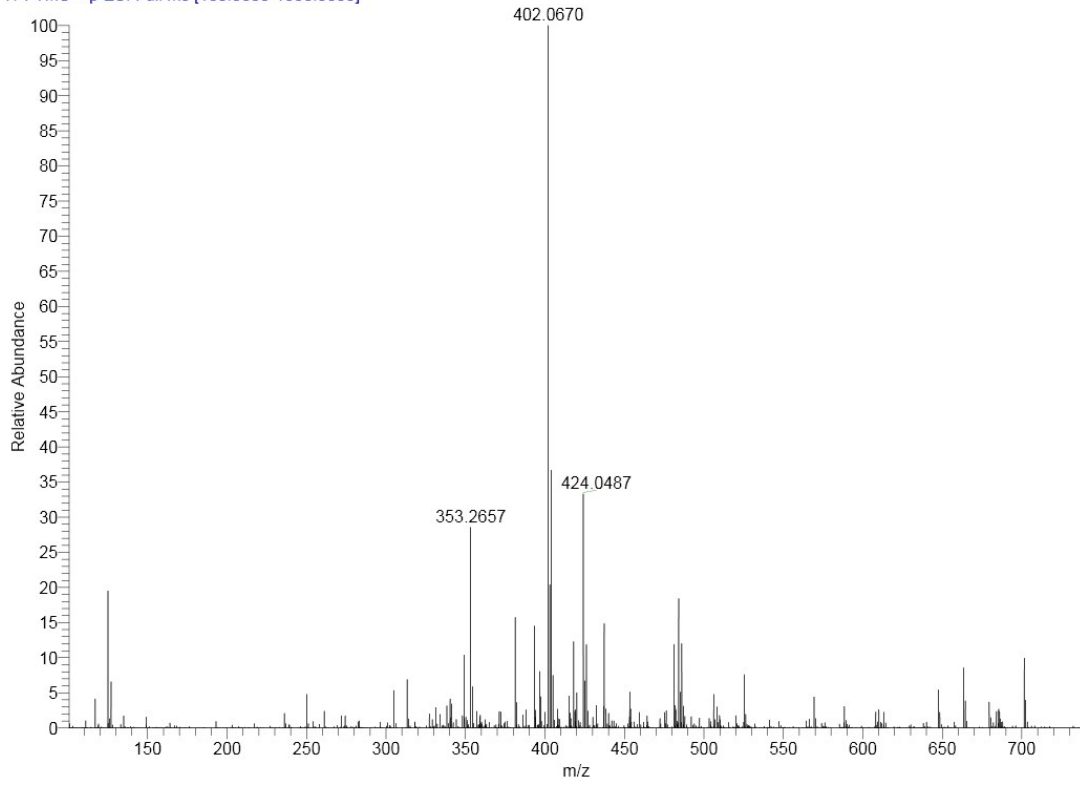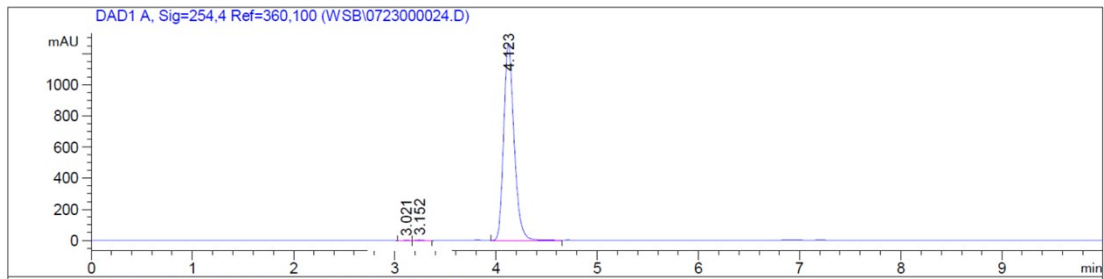

| 峰 # | 保留时间 [min] | 类型 | 峰宽 [min] | 峰面积 [mAU*s] | 峰高 [mAU]   | 峰面积 %   |
|-----|------------|----|----------|-------------|------------|---------|
| 1   | 3.021      | BV | 0.0709   | 9.98661     | 2.12349    | 0.1373  |
| 2   | 3.152      | VV | 0.0821   | 19.55841    | 3.55893    | 0.2689  |
| 3   | 4.123      | BV | 0.1091   | 7242.91016  | 1017.42377 | 99.5937 |



**7-((5-((4-Trifluoromethylbenzyl)thio)-1,3,4-oxadiazol-2-yl)methoxy)-3,4-dihydroquinolin-2(1H)-one (5h)**

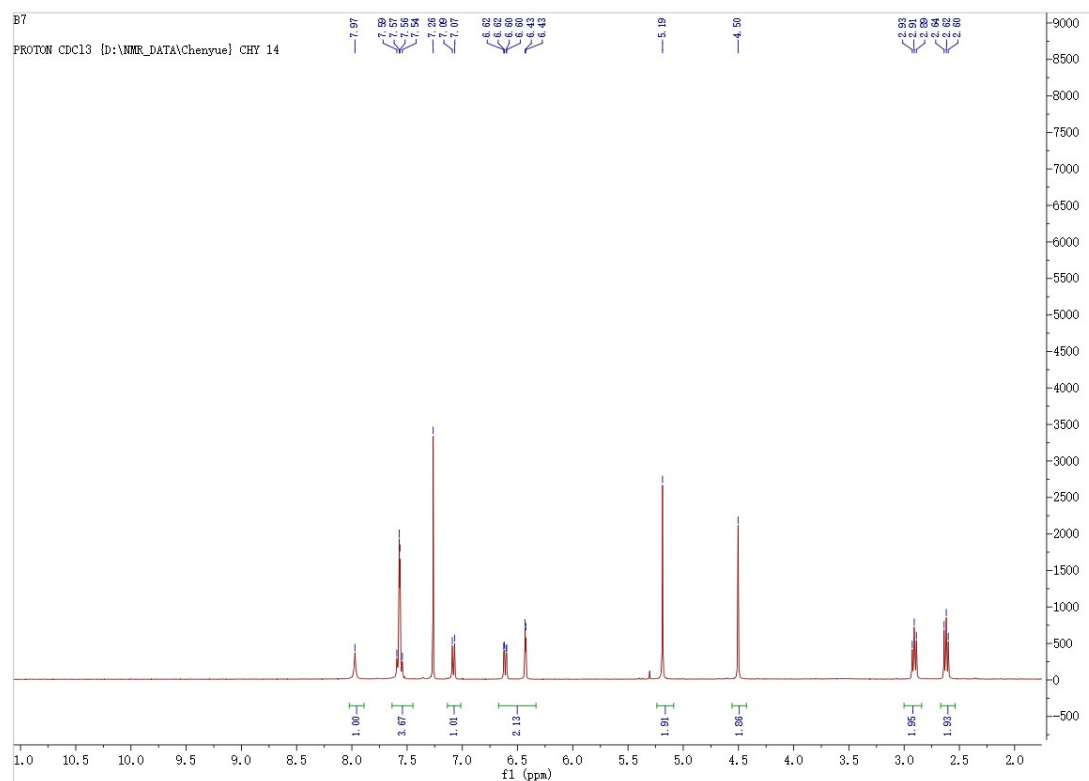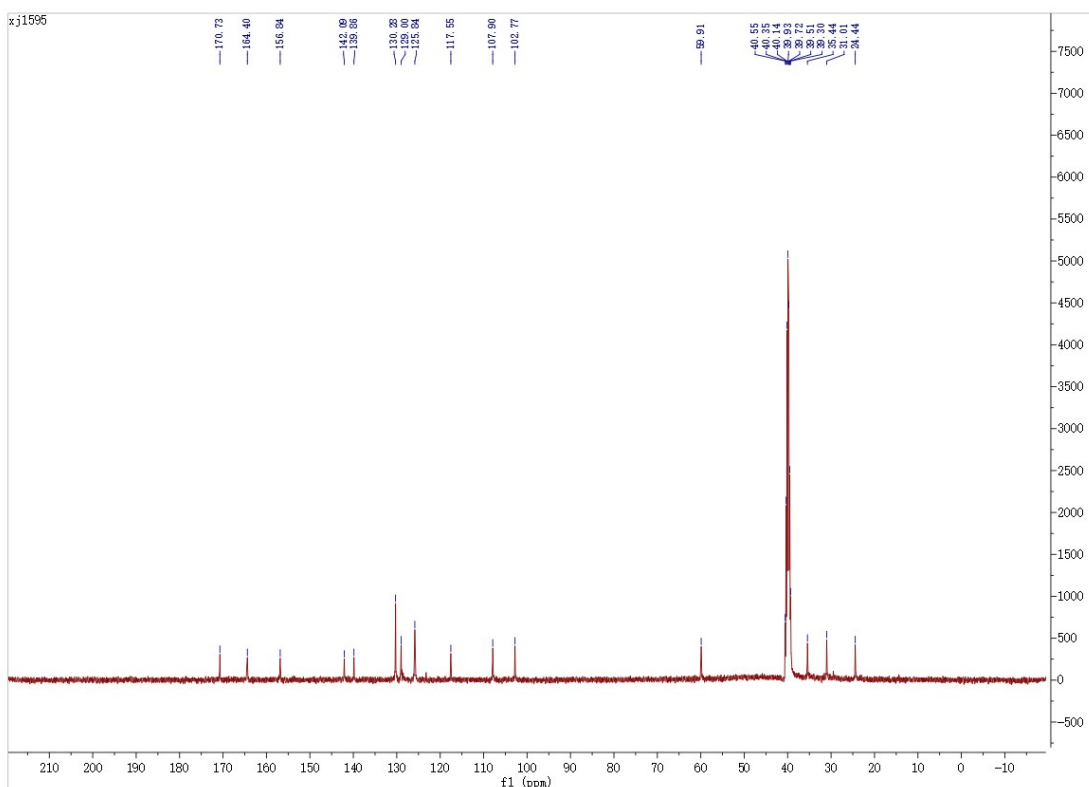

WSB-8 #25-28 RT: 0.11-0.13 AV: 4 NL: 2.77E8  
 T: FTMS + p ESI Full ms [100.0000-1000.0000]

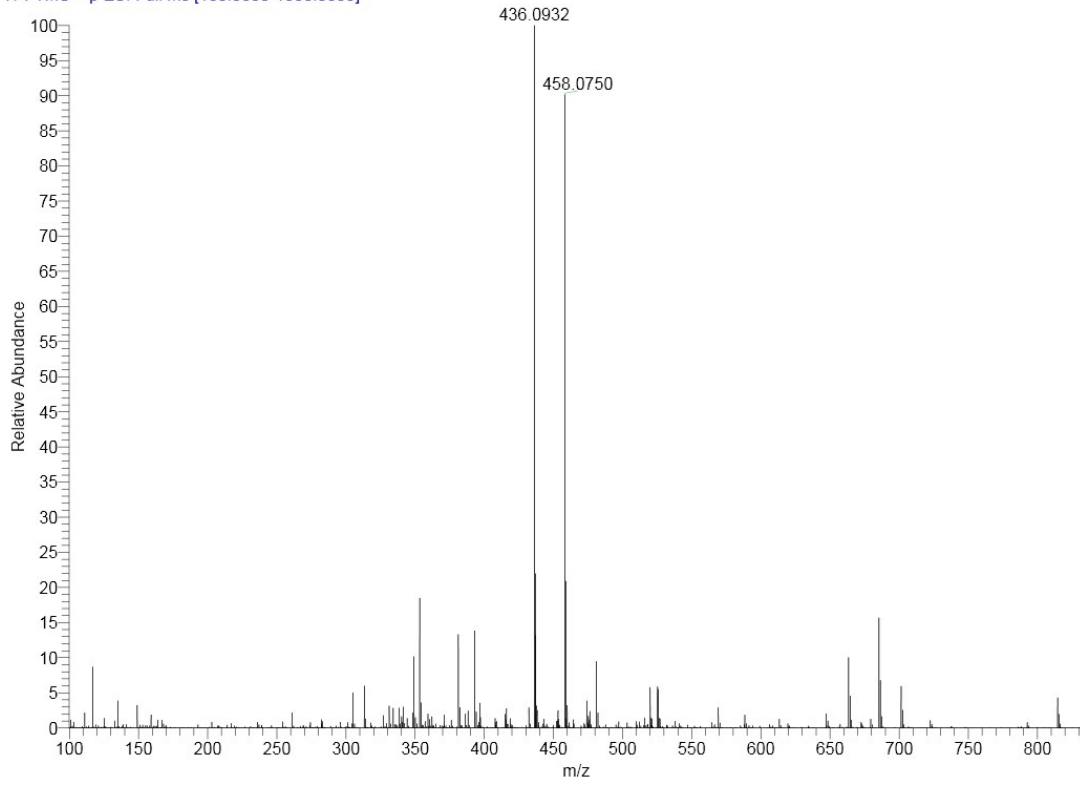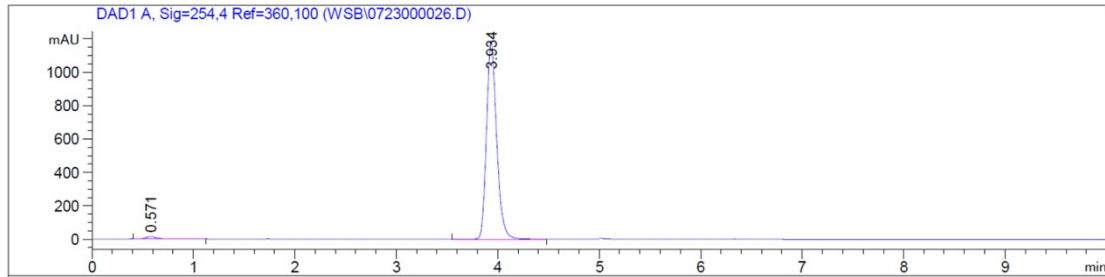

| 峰 # | 保留时间 [min] | 类型 | 峰宽 [min] | 峰面积 [mAU*s] | 峰高 [mAU]  | 峰面积 %   |
|-----|------------|----|----------|-------------|-----------|---------|
| 1   | 0.571      | BB | 0.1175   | 75.38078    | 9.82867   | 1.1011  |
| 2   | 3.934      | BV | 0.1071   | 6770.36963  | 974.33191 | 98.8989 |

7-((5-((4-Methylbenzyl)thio)-1,3,4-oxadiazol-2-yl)methoxy)-3,4-dihydroquinolin-2(1H)-one (5i)

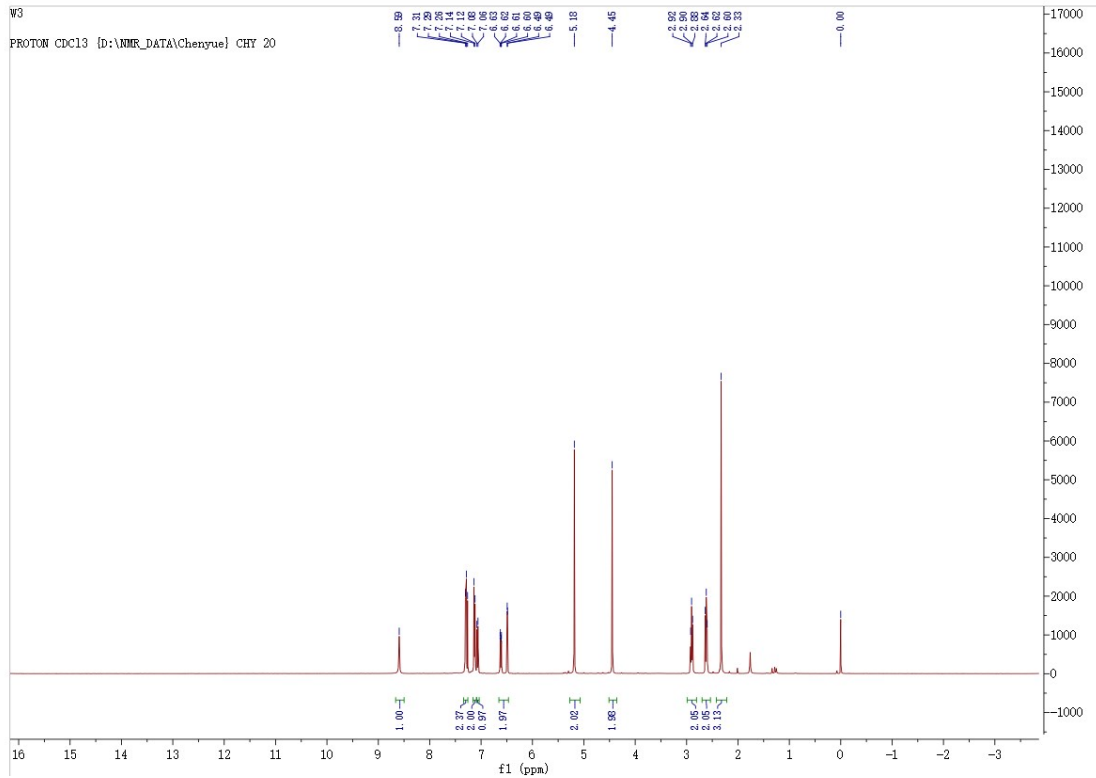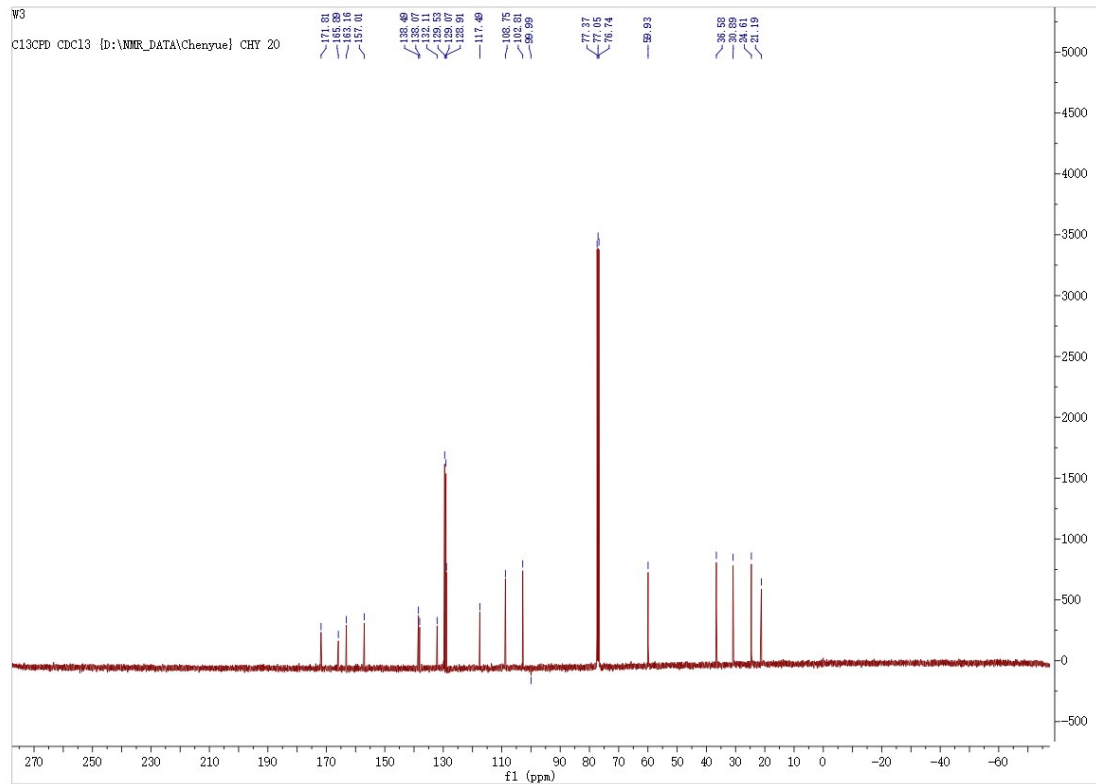

WSB-9 #25-27 RT: 0.11-0.12 AV: 3 NL: 5.03E8  
 T: FTMS + p ESI Full ms [100.0000-1000.0000]

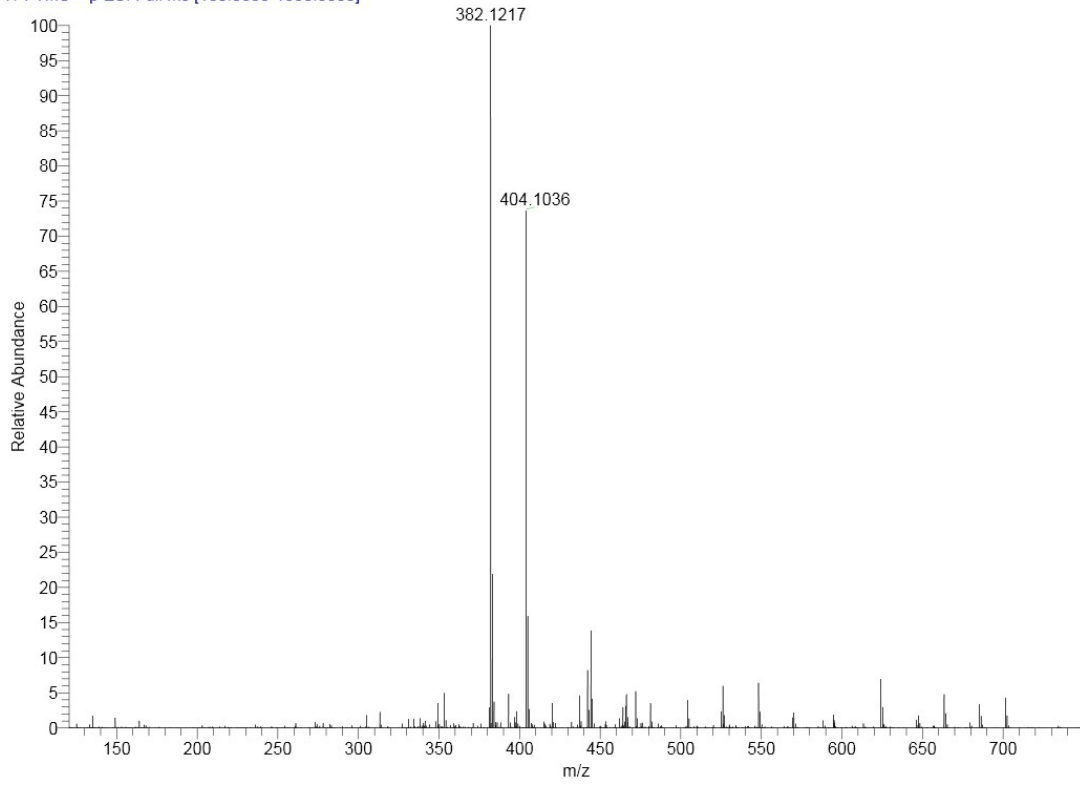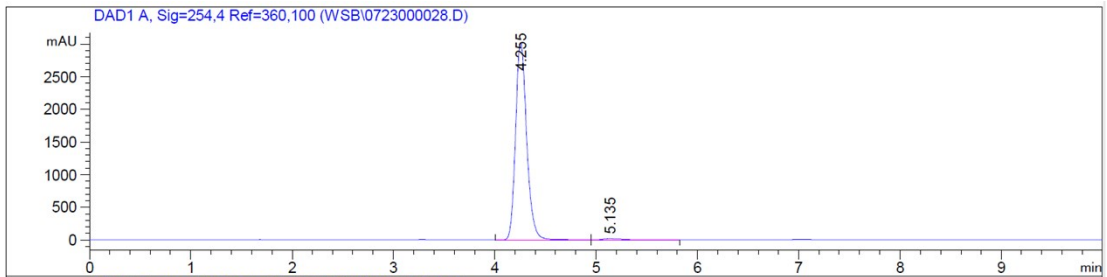

| 峰 # | 保留时间 [min] | 类型 | 峰宽 [min] | 峰面积 [mAU*s] | 峰高 [mAU]   | 峰面积 %   |
|-----|------------|----|----------|-------------|------------|---------|
| 1   | 4.255      | VV | 0.1174   | 2.31617e4   | 3023.70532 | 98.9102 |
| 2   | 5.135      | VB | 0.1820   | 255.19794   | 19.58198   | 1.0898  |

***N*-3-((5-(Benzylthio)-1,3,4-oxadiazol-2-yl)methoxy)phenyl)acetamide (10a)**

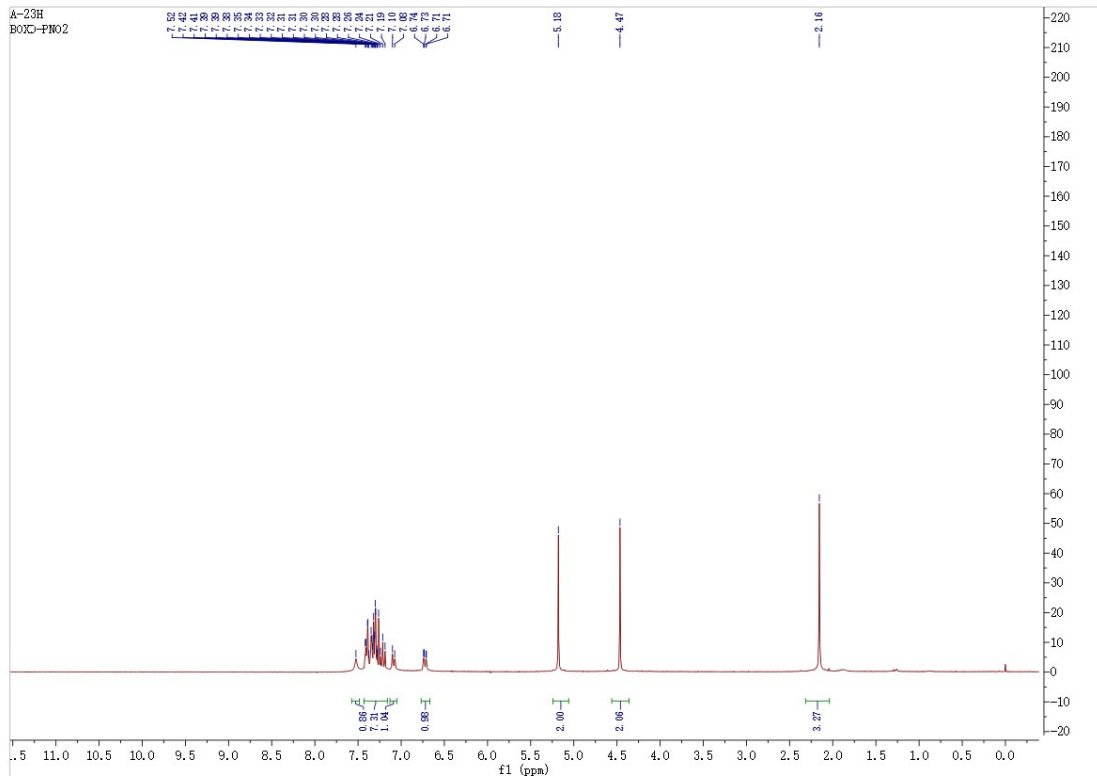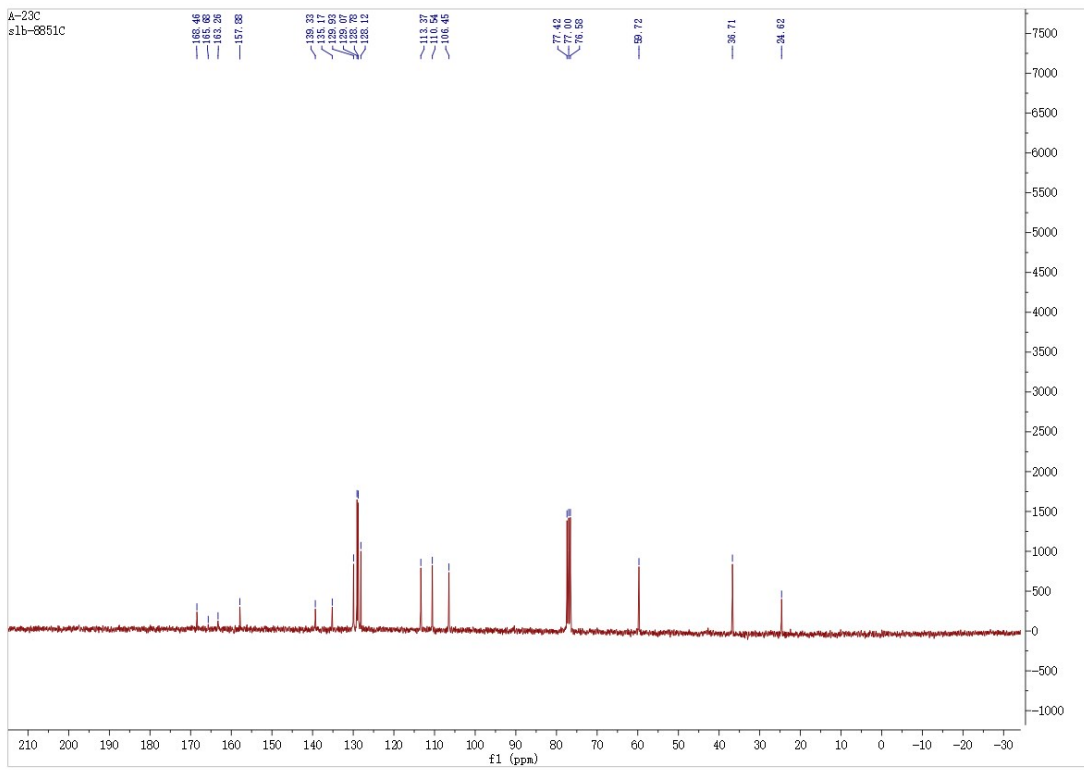

WSB-10 #28-31 RT: 0.13-0.14 AV: 4 NL: 6.83E8  
 T: FTMS + p ESI Full ms [100.0000-1000.0000]

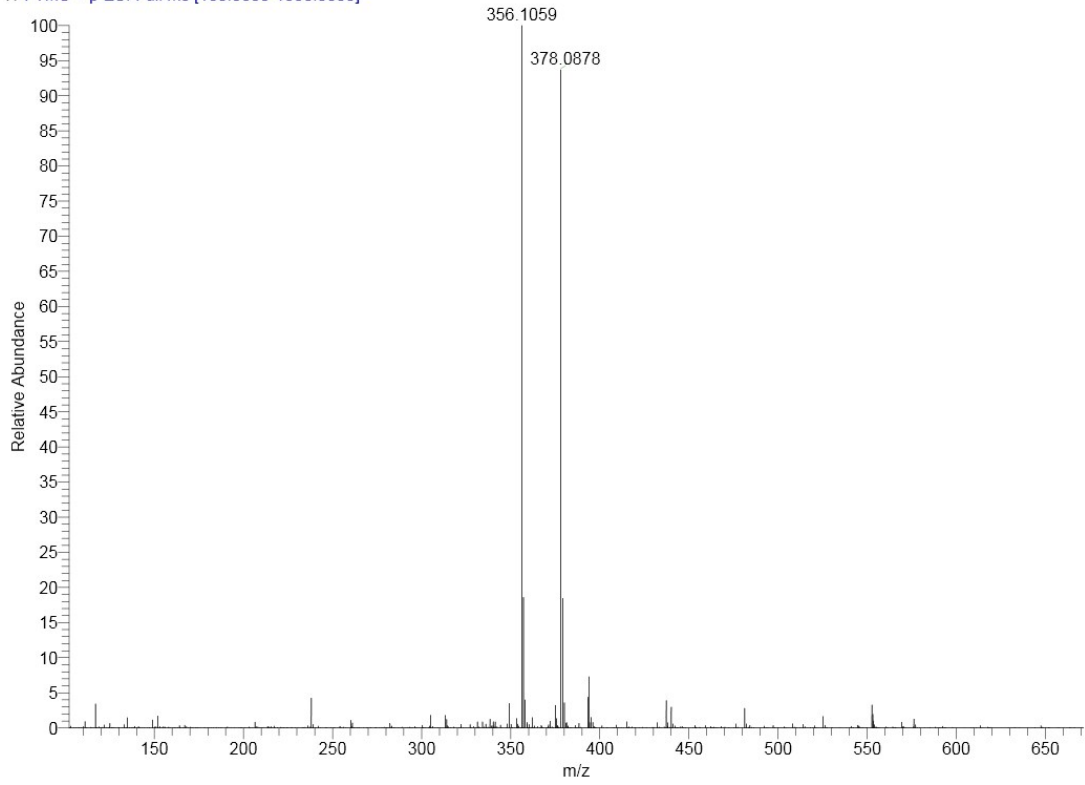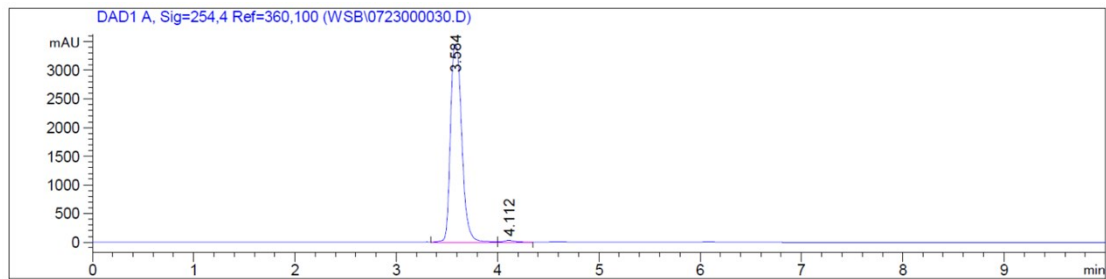

| 峰 # | 保留时间 [min] | 类型 | 峰宽 [min] | 峰面积 [mAU*s] | 峰高 [mAU]   | 峰面积 %   |
|-----|------------|----|----------|-------------|------------|---------|
| 1   | 3.584      | VV | 0.1219   | 2.66512e4   | 3457.18848 | 99.1414 |
| 2   | 4.112      | VB | 0.1155   | 230.80208   | 30.08572   | 0.8586  |

**N-(3-((5-(2-Fluorobenzyl)thio)-1,3,4-oxadiazol-2-yl)methoxy)phenyl)acetamide (10b)**

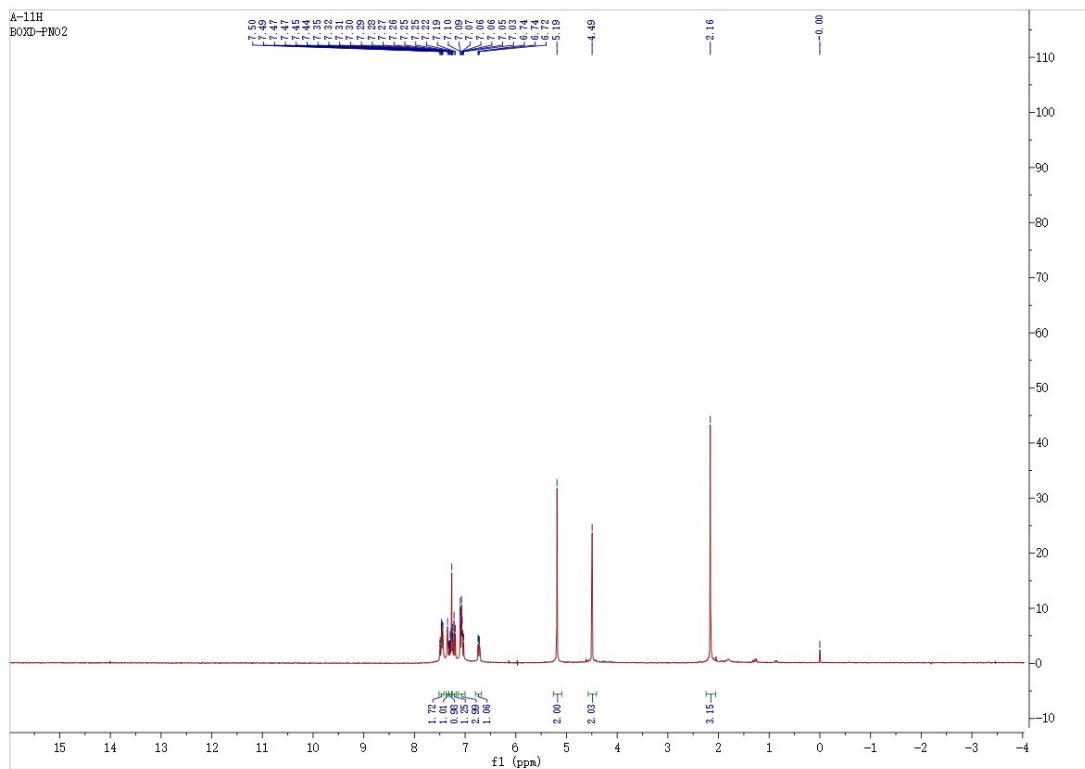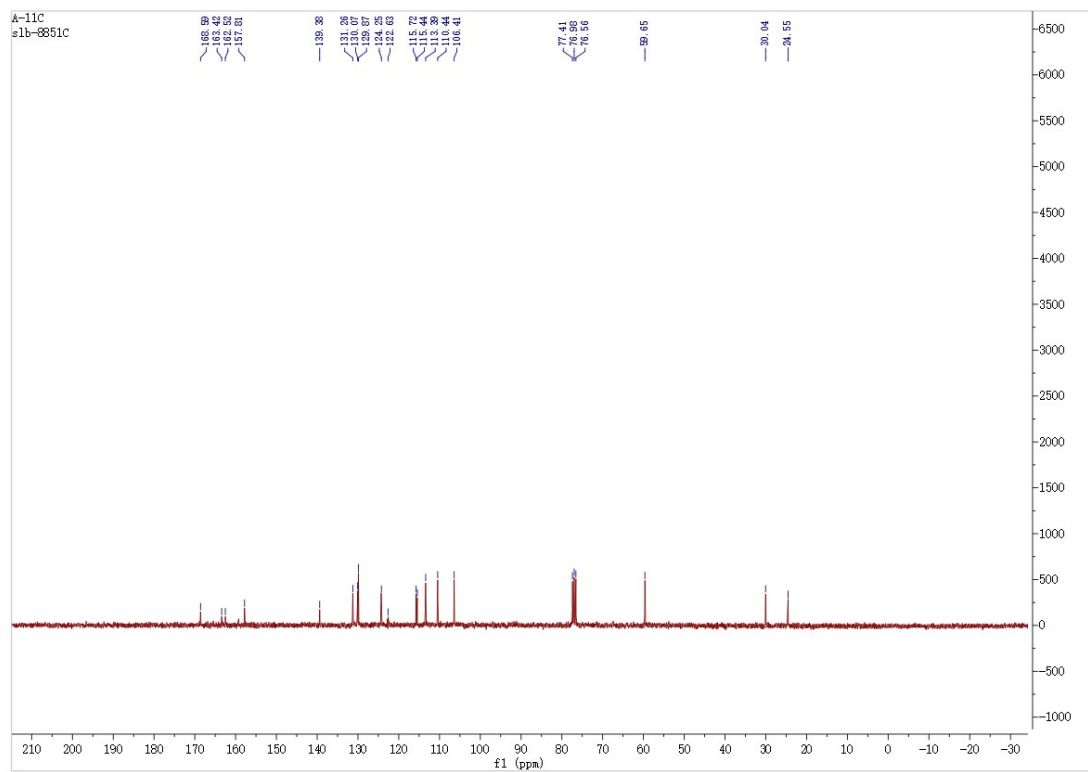

WSB-11 #28-31 RT: 0.13-0.14 AV: 4 NL: 6.60E8  
 T: FTMS + p ESI Full ms [100.0000-1000.0000]

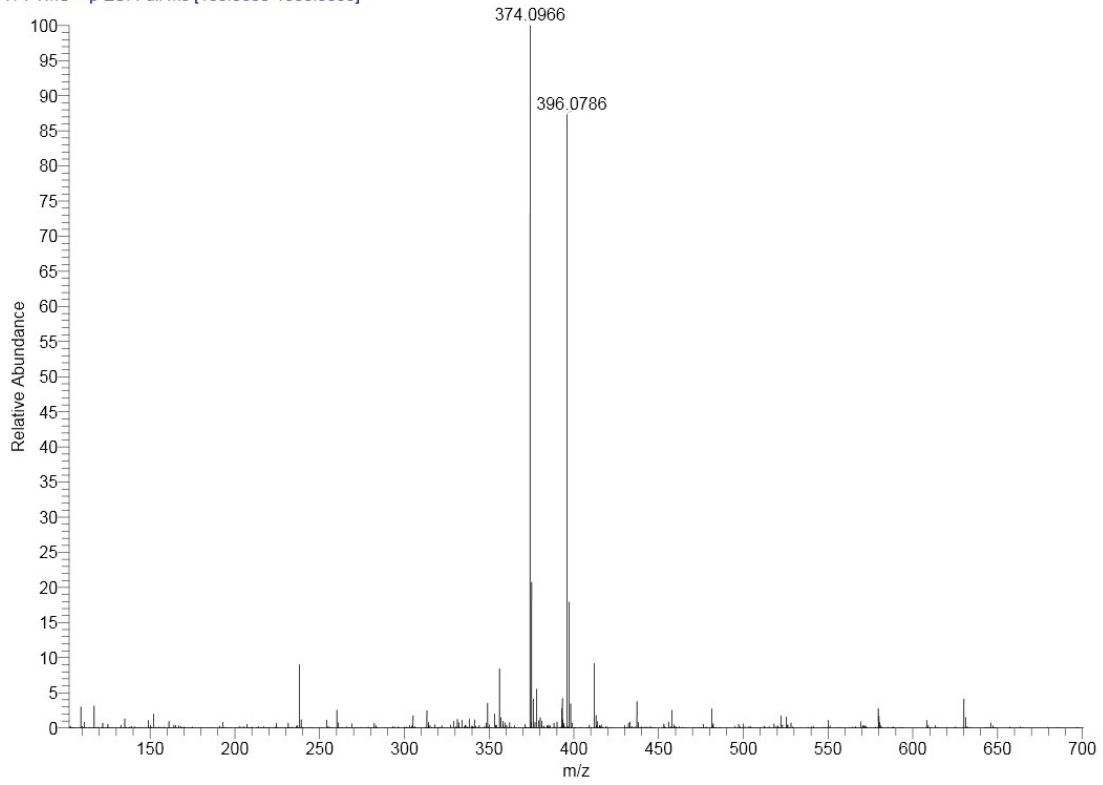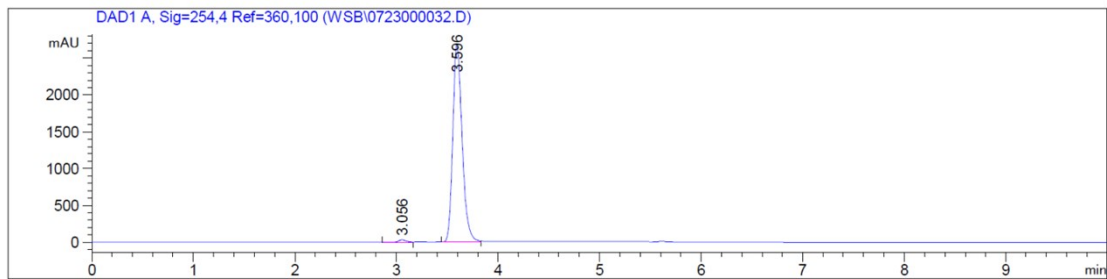

| 峰 # | 保留时间 [min] | 类型 | 峰宽 [min] | 峰面积 [mAU*s] | 峰高 [mAU]   | 峰面积 %   |
|-----|------------|----|----------|-------------|------------|---------|
| 1   | 3.056      | BV | 0.0767   | 156.56313   | 31.10605   | 0.9053  |
| 2   | 3.596      | BV | 0.0984   | 1.71371e4   | 2688.71094 | 99.0947 |



**N-(3-((5-(3-Fluorobenzylthio)-1,3,4-oxadiazol-2-yl)methoxy)phenyl)acetamide (10c)**

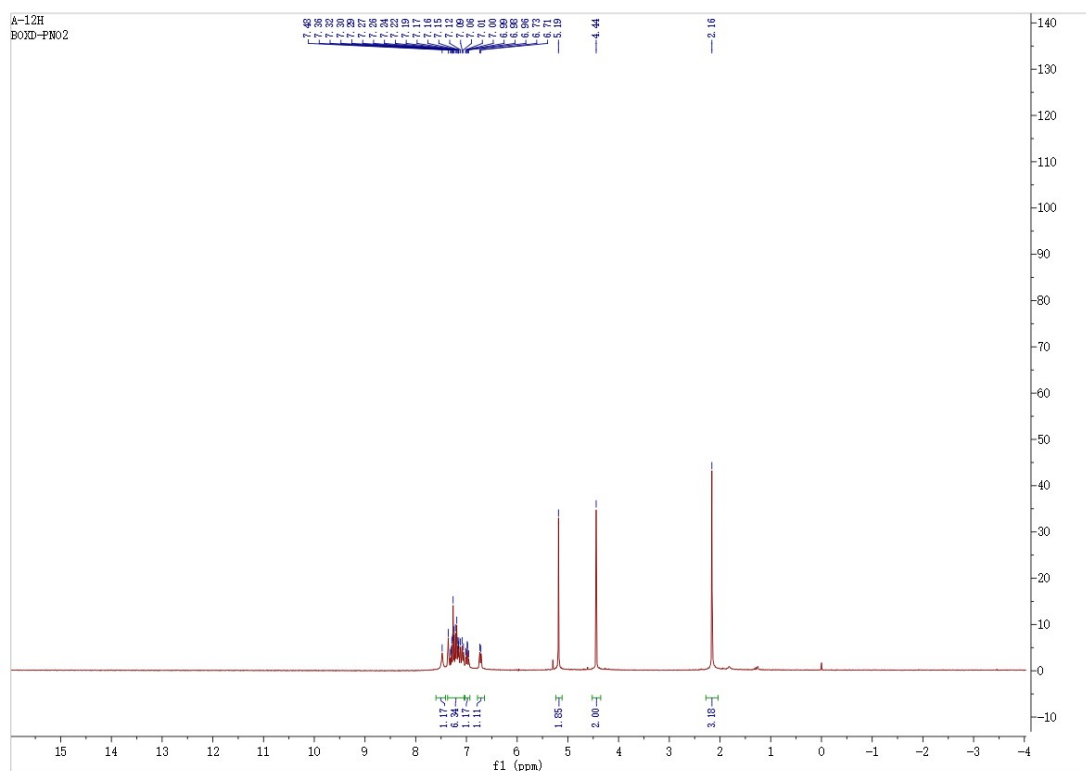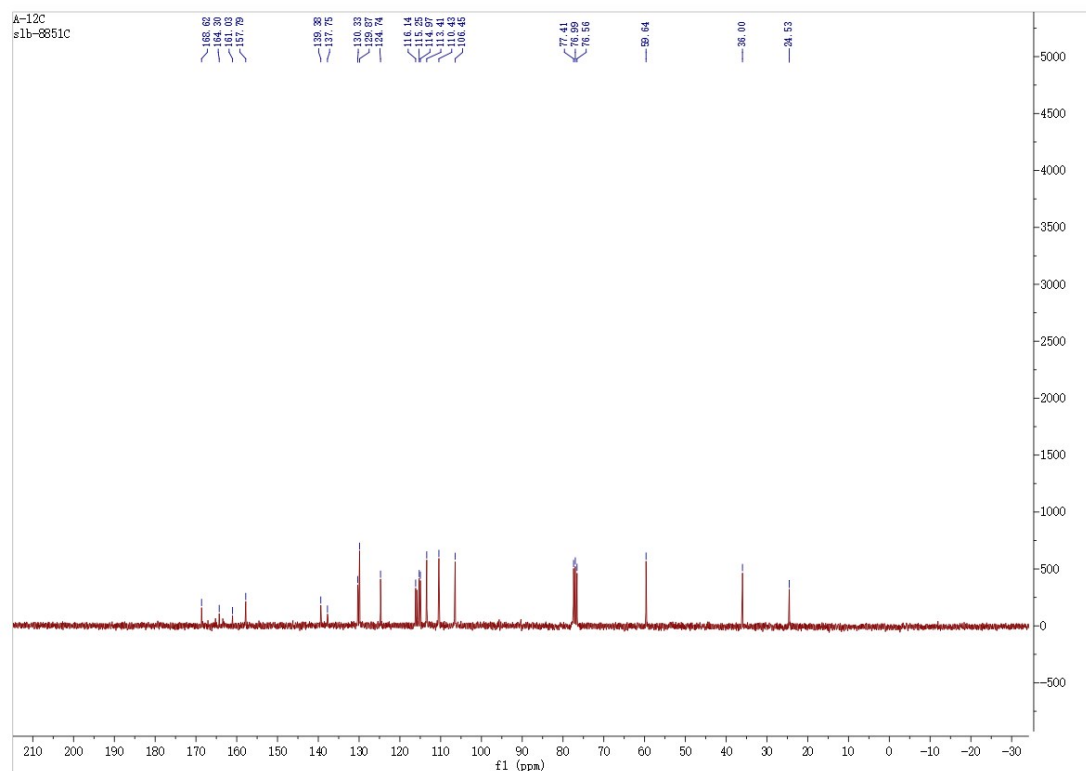

WSB-12 #13-20 RT: 0.06-0.09 AV: 8 NL: 7.44E9  
 T: FTMS + p ESI Full ms [100.0000-1000.0000]

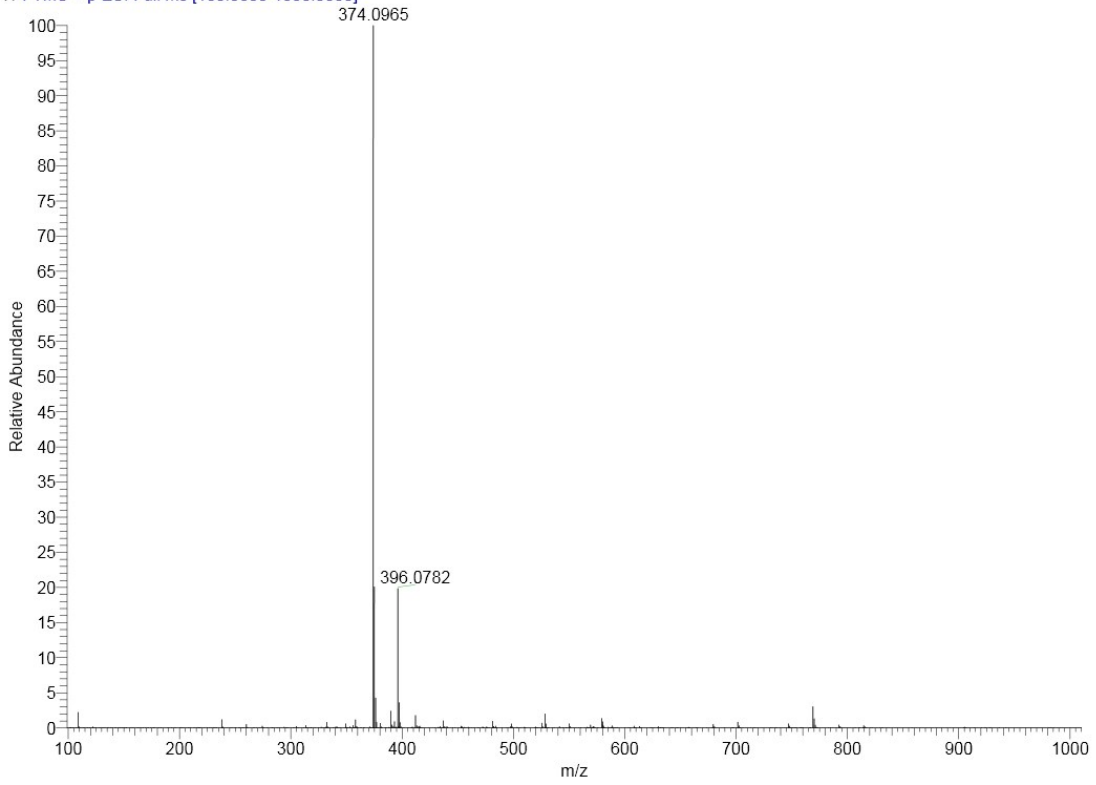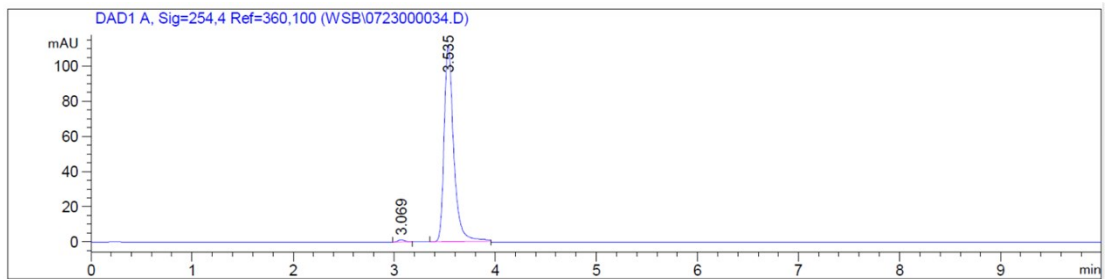

| 峰 # | 保留时间 [min] | 类型 | 峰宽 [min] | 峰面积 [mAU*s] | 峰高 [mAU]  | 峰面积 %   |
|-----|------------|----|----------|-------------|-----------|---------|
| 1   | 3.069      | BB | 0.0731   | 5.51989     | 1.16946   | 0.7487  |
| 2   | 3.535      | BV | 0.0981   | 731.73938   | 112.12041 | 99.2513 |

***N*-3-((5-((4-Fluorobenzyl)thio)-1,3,4-oxadiazol-2-yl)methoxy)phenyl)acetamide (10d)**

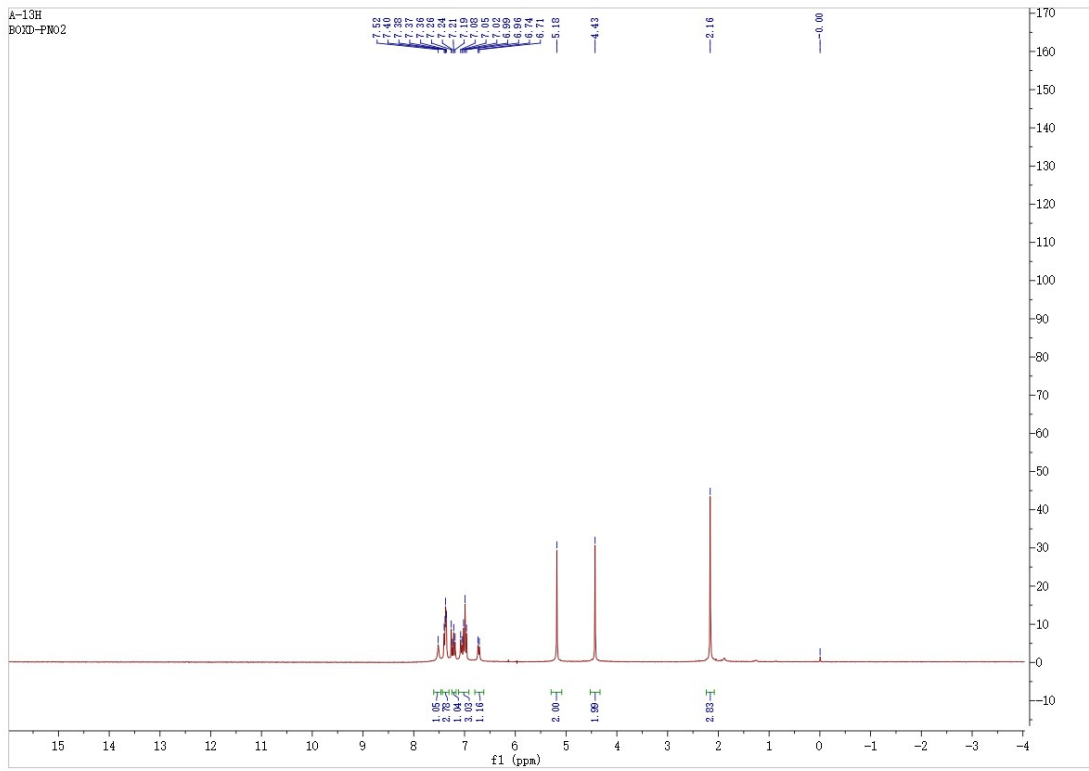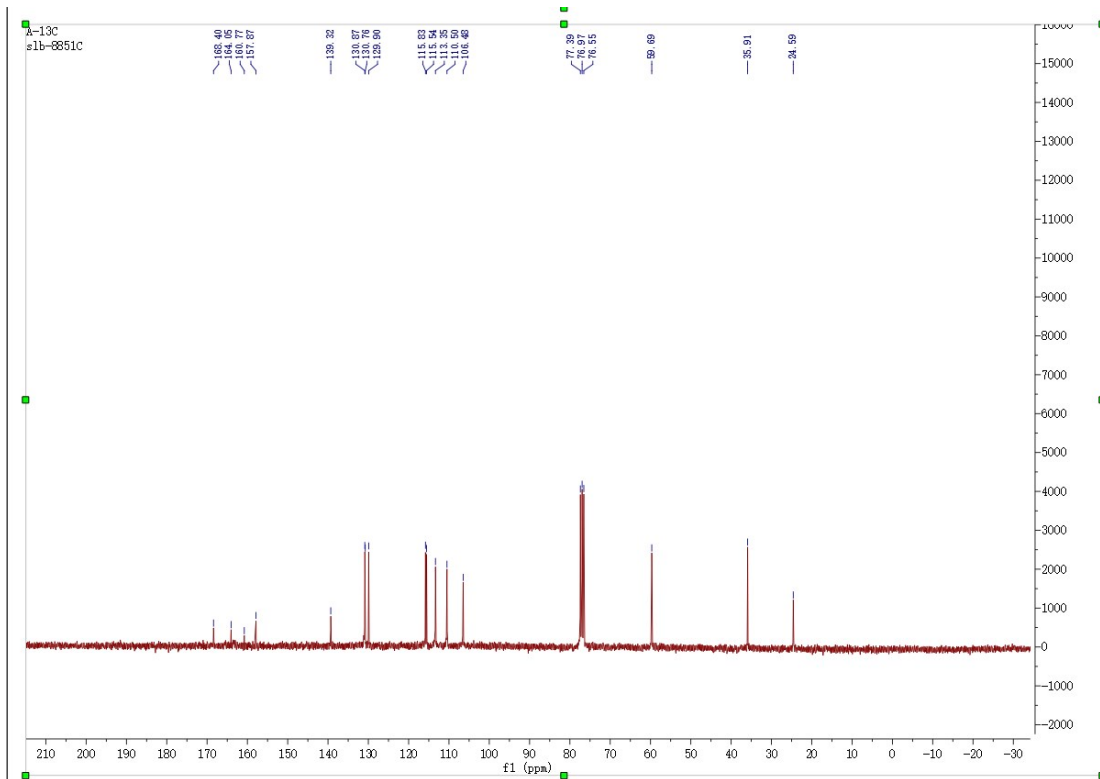

WSB-13 #23-26 RT: 0.11-0.12 AV: 4 NL: 2.34E9  
 T: FTMS + p ESI Full ms [100.0000-1000.0000]

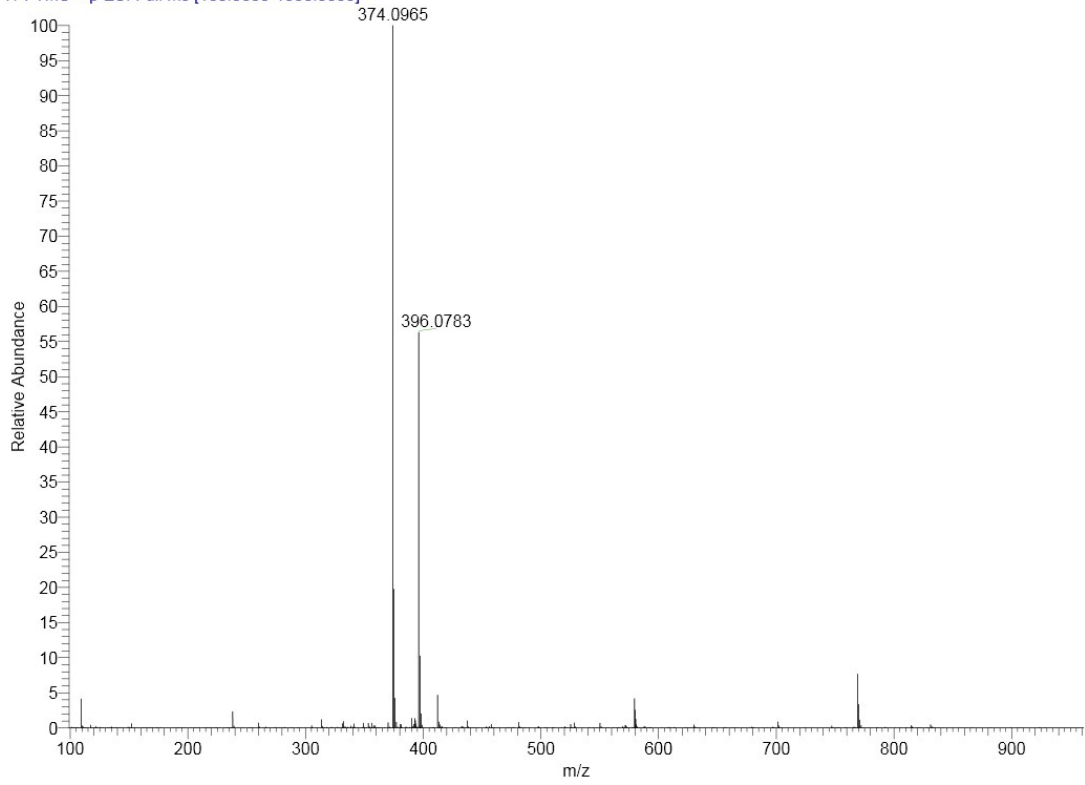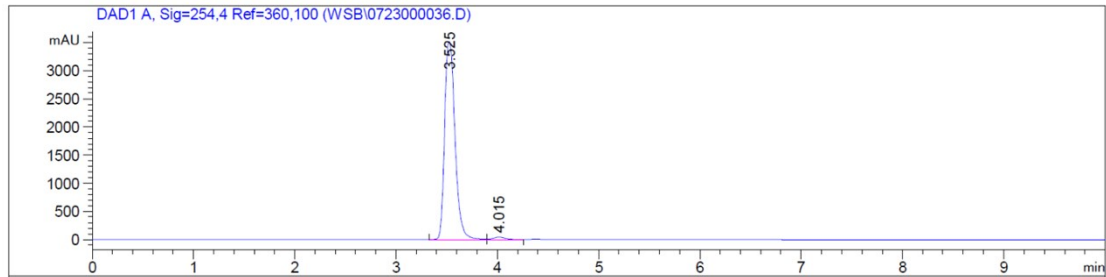

| 峰 # | 保留时间 [min] | 类型 | 峰宽 [min] | 峰面积 [mAU*s] | 峰高 [mAU]   | 峰面积 %   |
|-----|------------|----|----------|-------------|------------|---------|
| 1   | 3.525      | VV | 0.1130   | 2.50620e4   | 3522.91797 | 98.7015 |
| 2   | 4.015      | VB | 0.1172   | 329.71811   | 42.18111   | 1.2985  |

**N-(3-((5-((2-Chlorobenzyl)thio)-1,3,4-oxadiazol-2-yl)methoxy)phenyl)acetamide (10e)**

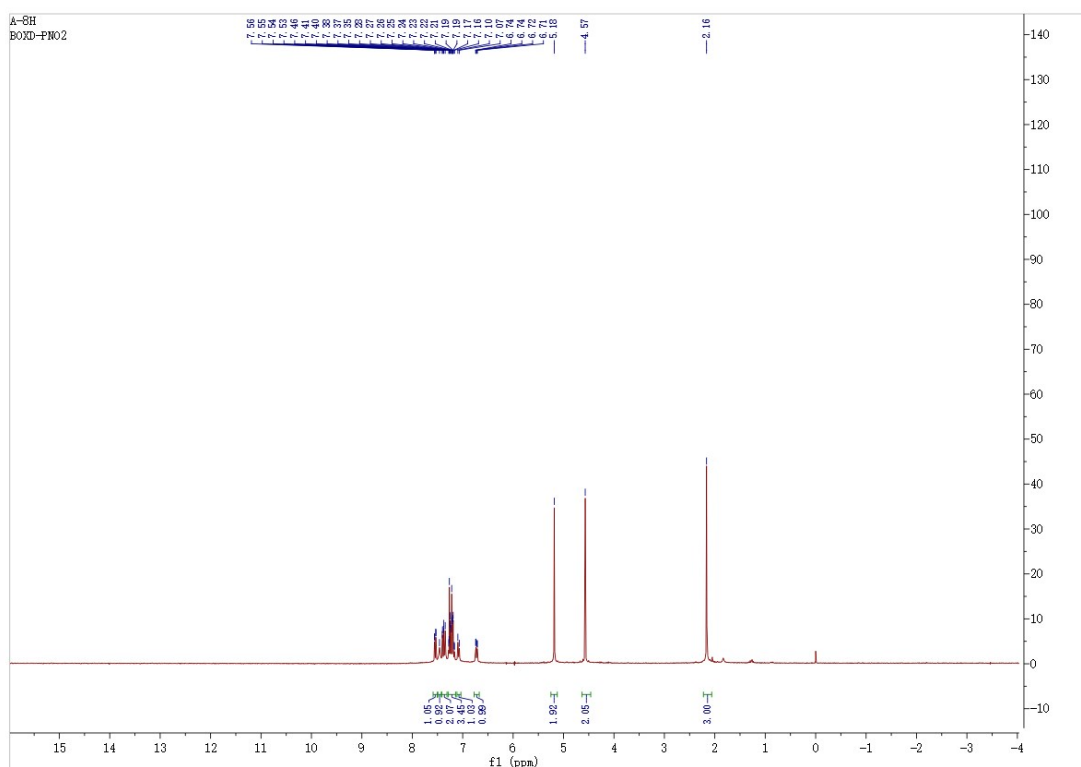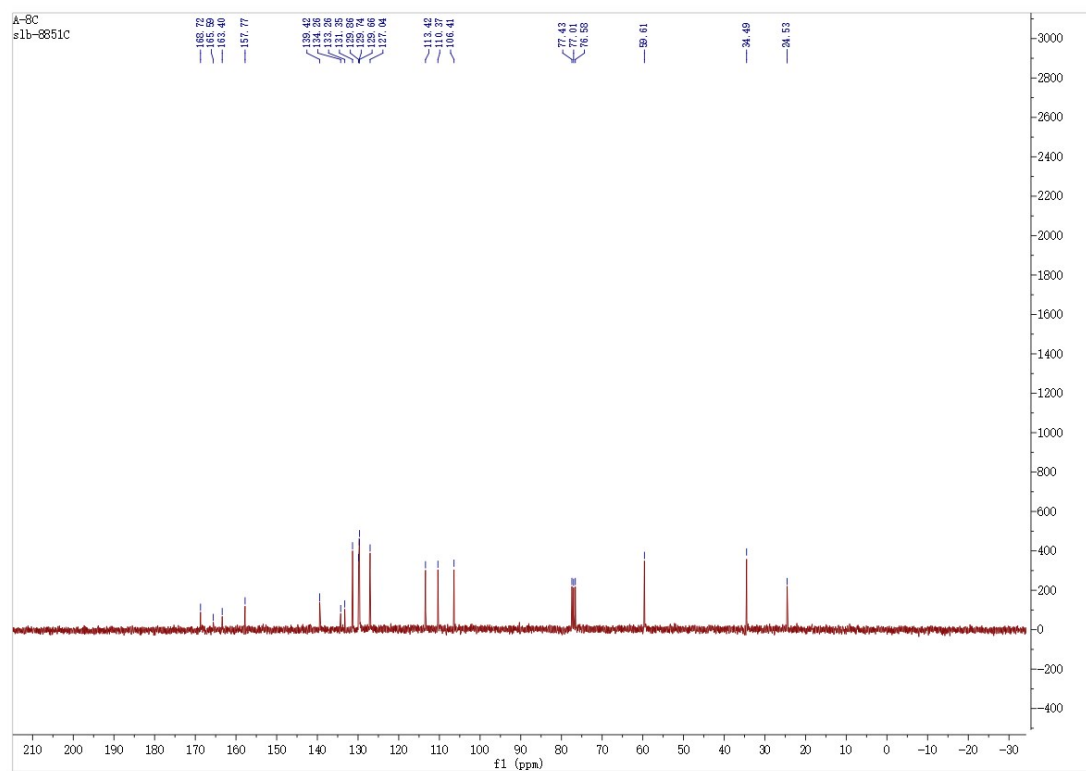

WSB-14 #24-27 RT: 0.11-0.12 AV: 4 NL: 2.46E9  
 T: FTMS + p ESI Full ms [100.0000-1000.0000]

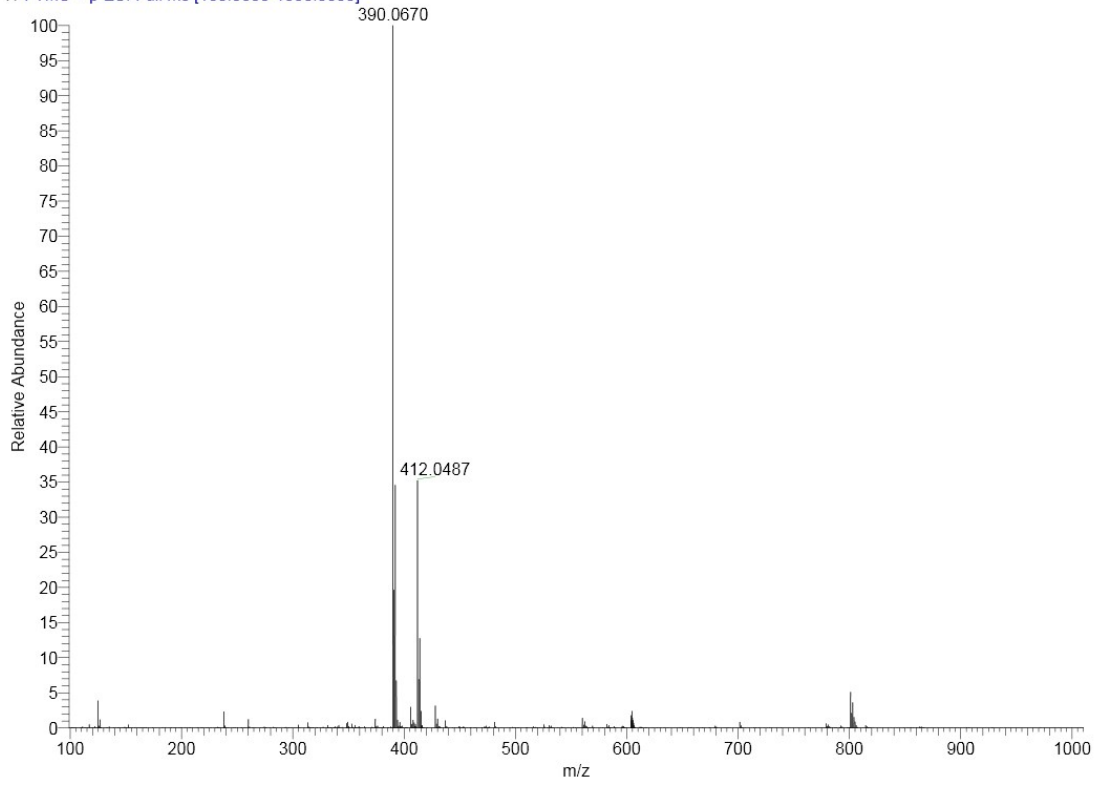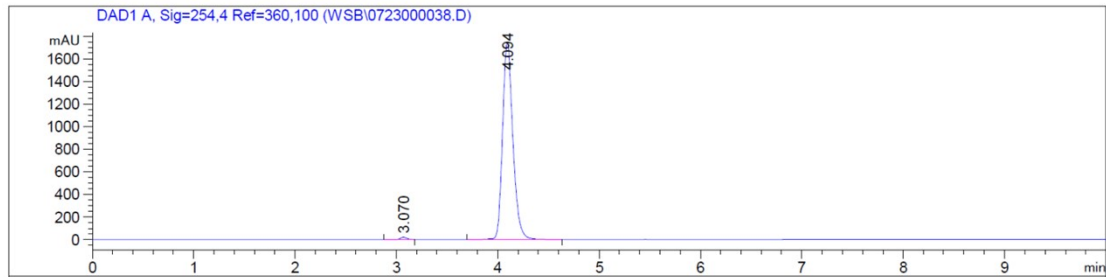

| 峰 # | 保留时间 [min] | 类型  | 峰宽 [min] | 峰面积 [mAU*s] | 峰高 [mAU]   | 峰面积 %   |
|-----|------------|-----|----------|-------------|------------|---------|
| 1   | 3.070      | BV  | 0.0807   | 103.27309   | 19.86325   | 0.8286  |
| 2   | 4.094      | BBA | 0.1086   | 1.23605e4   | 1746.55688 | 99.1714 |

**N-(3-((5-((3-Chlorobenzyl)thio)-1,3,4-oxadiazol-2-yl)methoxy)phenyl)acetamide**

**(10f)**

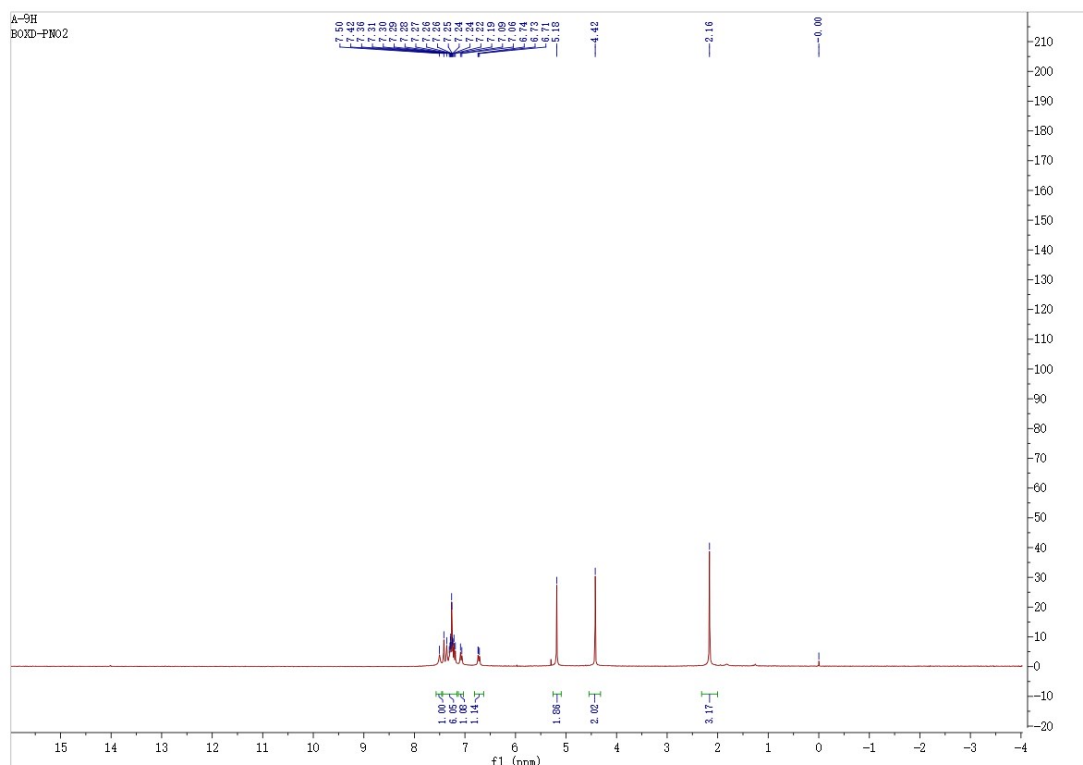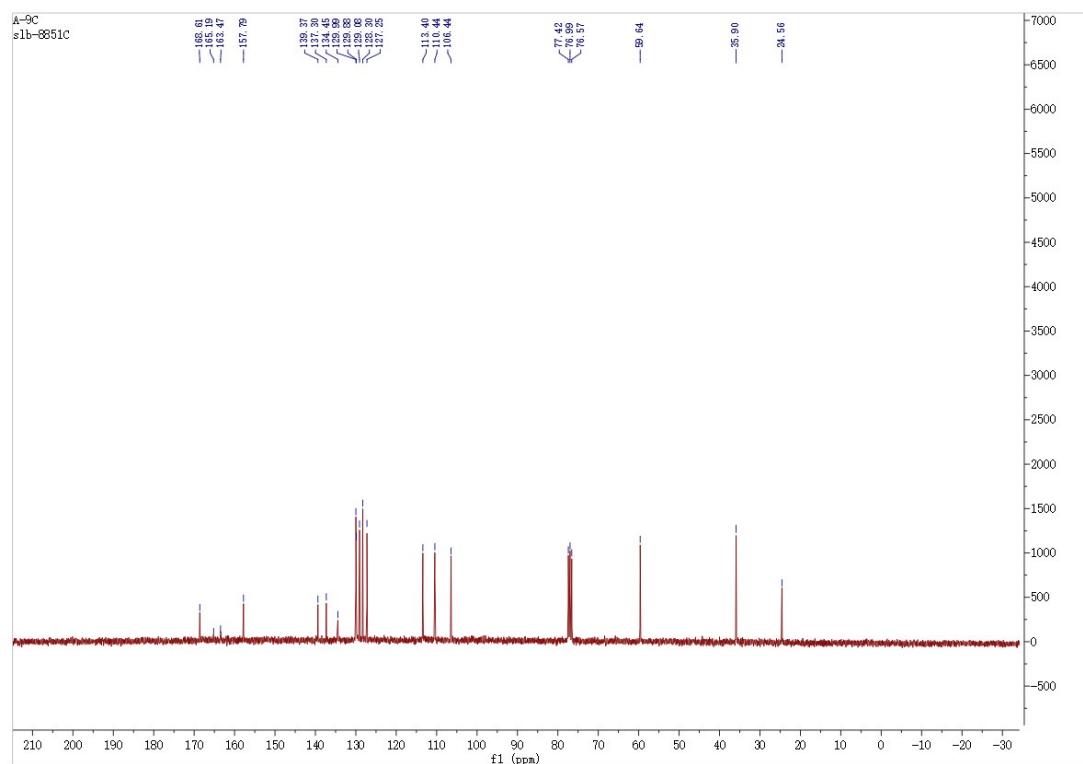

WSB-15\_200727141410 #40 RT: 0.18 AV: 1 SB: 52 0.59-0.81 NL: 3.55E8  
 T: FTMS + p ESI Full ms [100.0000-1000.0000]

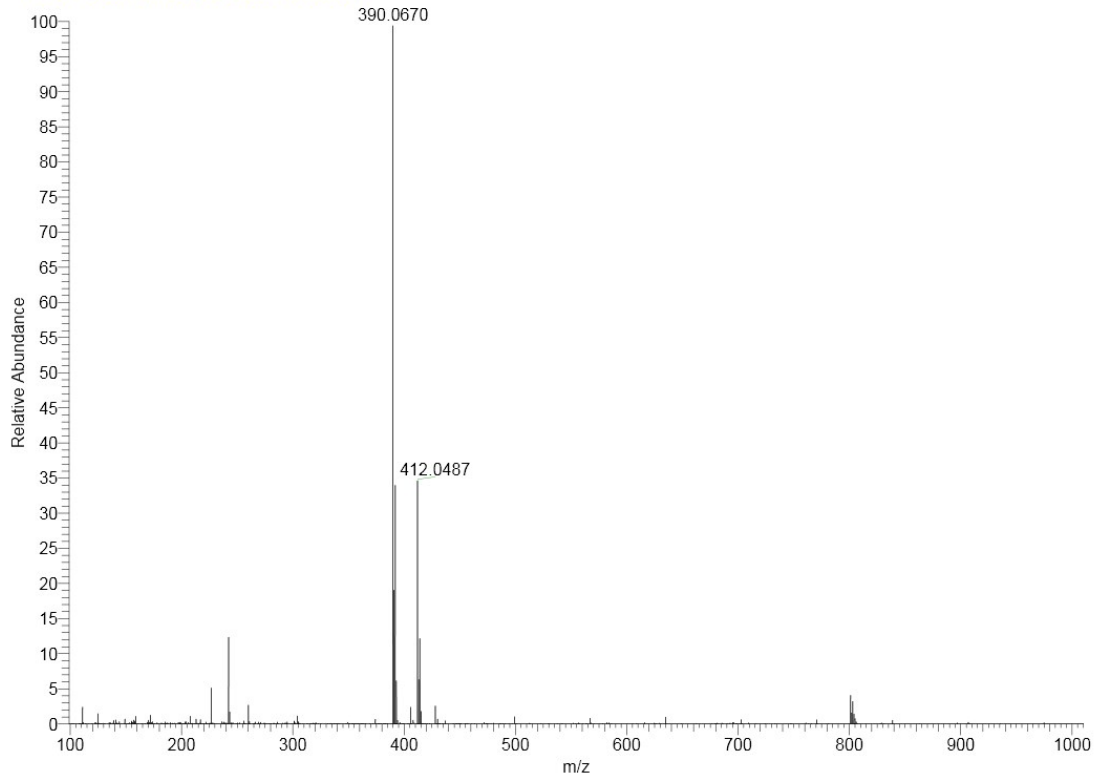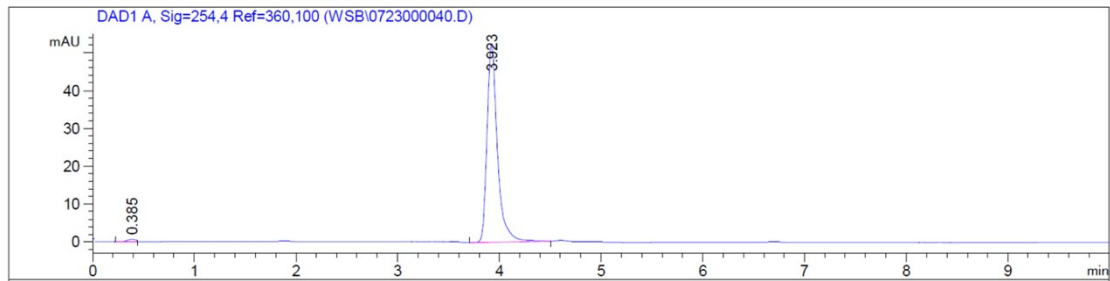

| 峰 # | 保留时间 [min] | 类型 | 峰宽 [min] | 峰面积 [mAU*s] | 峰高 [mAU]   | 峰面积 %   |
|-----|------------|----|----------|-------------|------------|---------|
| 1   | 0.385      | BV | 0.0864   | 4.01159     | 7.04689e-1 | 1.0647  |
| 2   | 3.923      | BB | 0.1066   | 372.76541   | 52.65183   | 98.9353 |



***N*-[3-((5-((4-Chlorobenzyl)thio)-1,3,4-oxadiazol-2-yl)methoxy)phenyl]acetamide (10g)**

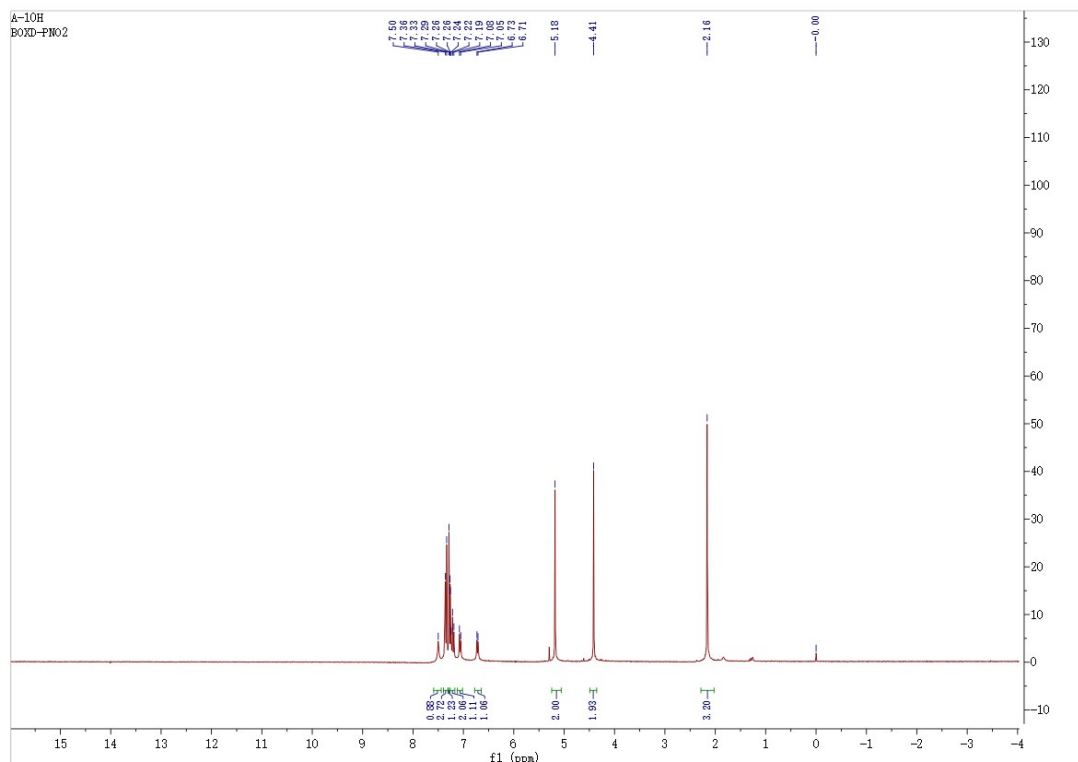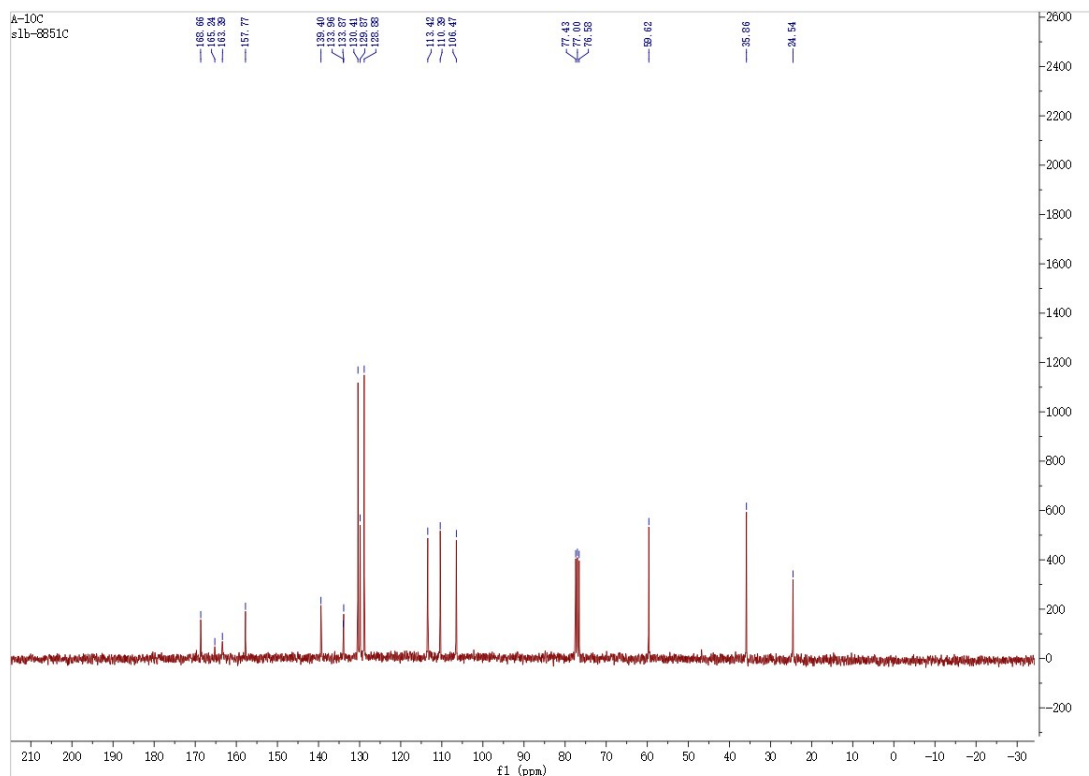

WSB-16 #21-23 RT: 0.10-0.11 AV: 3 NL: 2.48E9  
 T: FTMS + p ESI Full ms [100.0000-1000.0000]

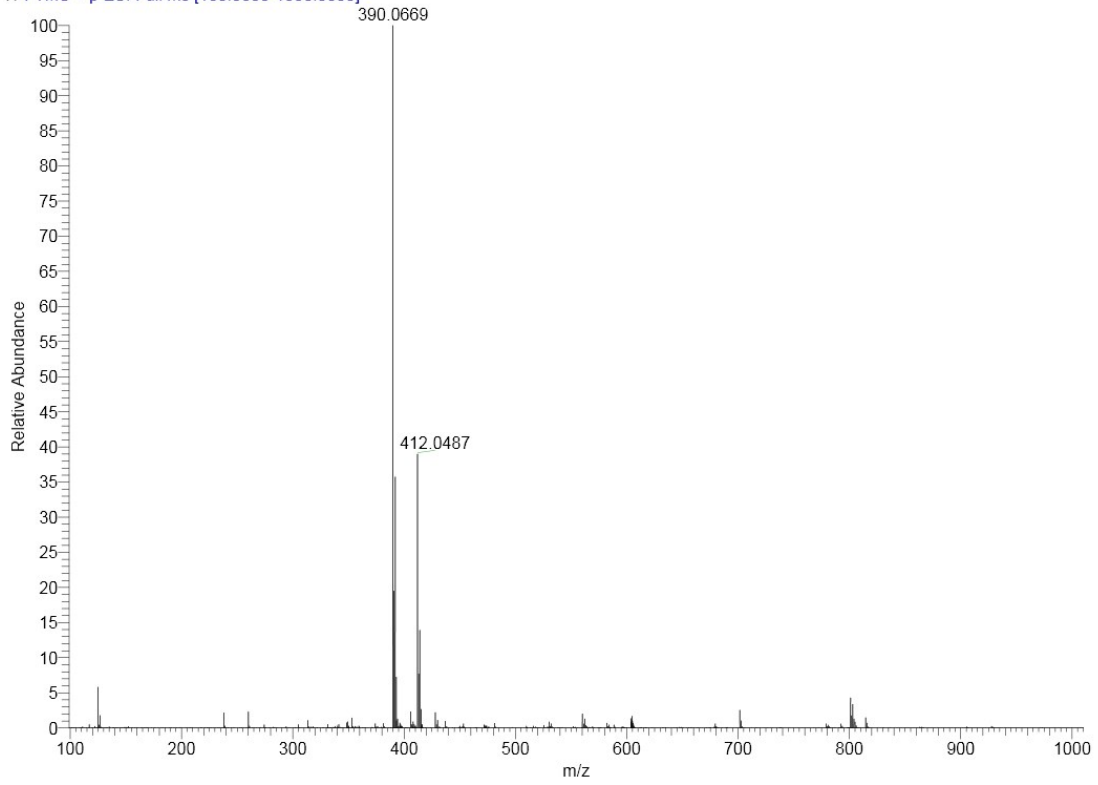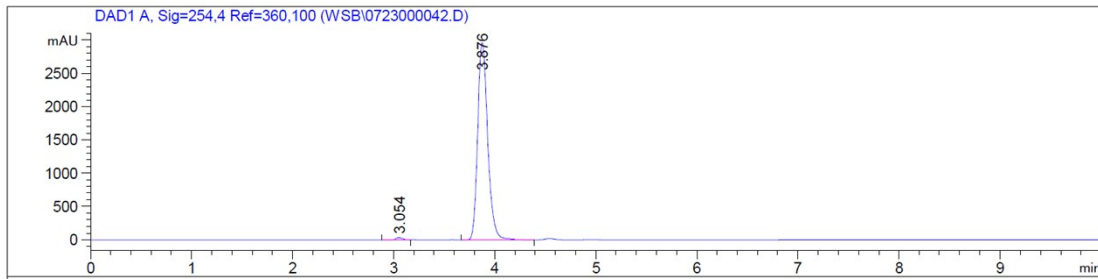

| 峰 # | 保留时间 [min] | 类型 | 峰宽 [min] | 峰面积 [mAU*s] | 峰高 [mAU]   | 峰面积 %   |
|-----|------------|----|----------|-------------|------------|---------|
| 1   | 3.054      | VV | 0.0775   | 194.85475   | 38.18985   | 0.9403  |
| 2   | 3.876      | VB | 0.1085   | 2.05280e4   | 2974.74121 | 99.0597 |

*N*-3-((5-((2-Trifluoromethylbenzyl)thio)-1,3,4-oxadiazol-2-yl)methoxy)phenyl)acetamide (10h)

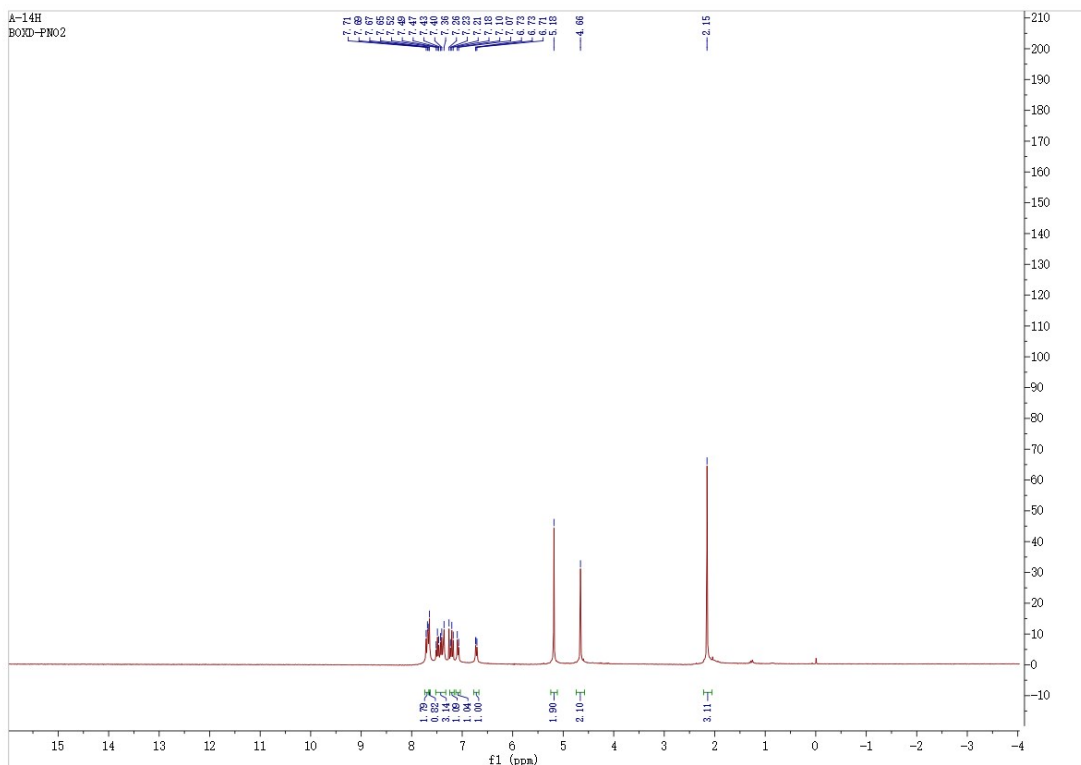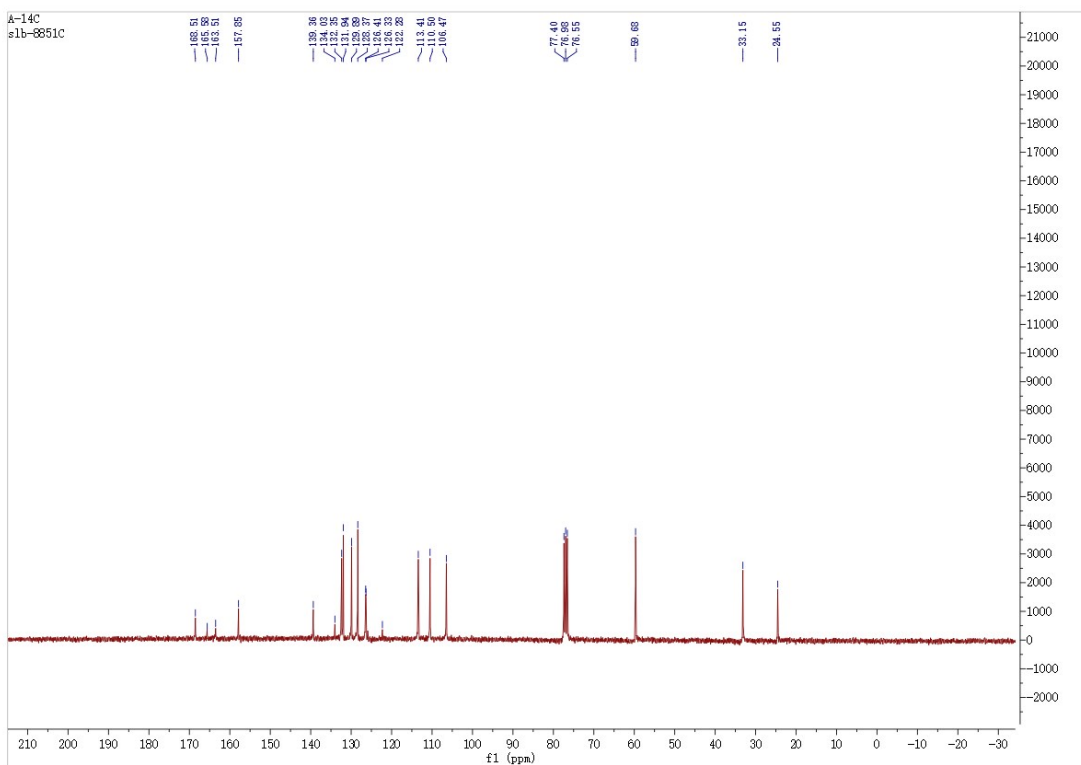

WSB-17\_200727142028 #26 RT: 0.12 AV: 1 NL: 5.99E9  
 T: FTMS + p ESI Full ms [100.0000-1000.0000]

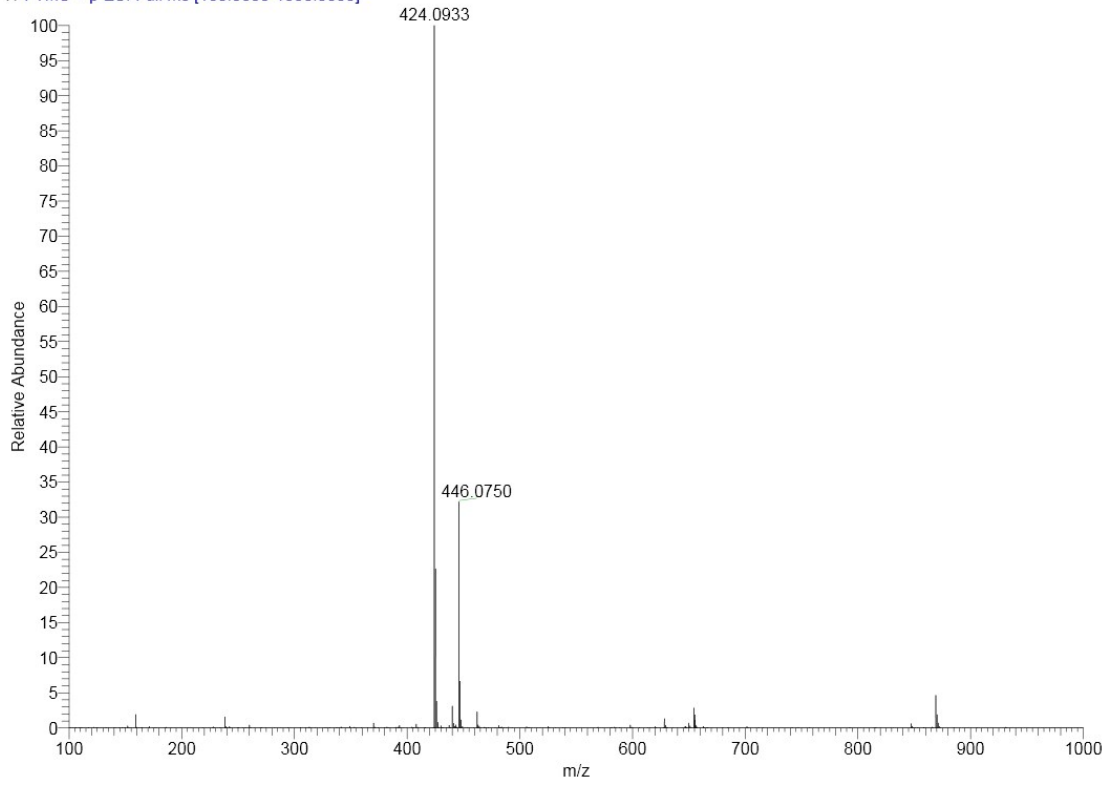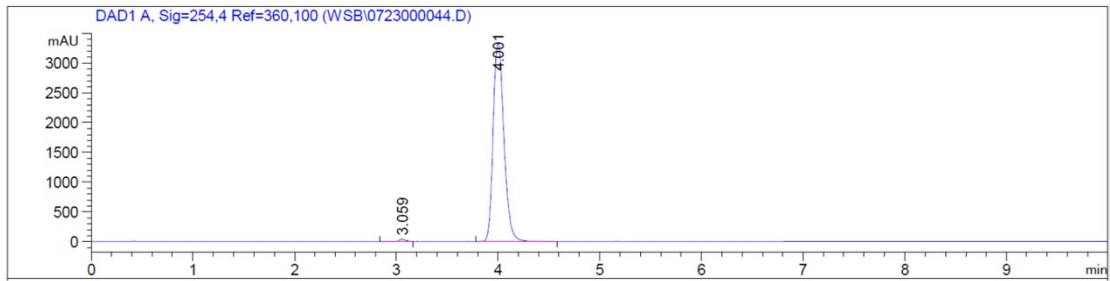

| 峰 # | 保留时间 [min] | 类型 | 峰宽 [min] | 峰面积 [mAU*s] | 峰高 [mAU]   | 峰面积 %   |
|-----|------------|----|----------|-------------|------------|---------|
| 1   | 3.059      | BV | 0.0798   | 202.91615   | 39.60815   | 0.8124  |
| 2   | 4.001      | VB | 0.1166   | 2.47742e4   | 3337.57422 | 99.1876 |

# *N*-3-((5-((3-Trifluoromethylbenzyl)thio)-1,3,4-oxadiazol-2-yl)methoxy)phenyl)acetamide (10i)

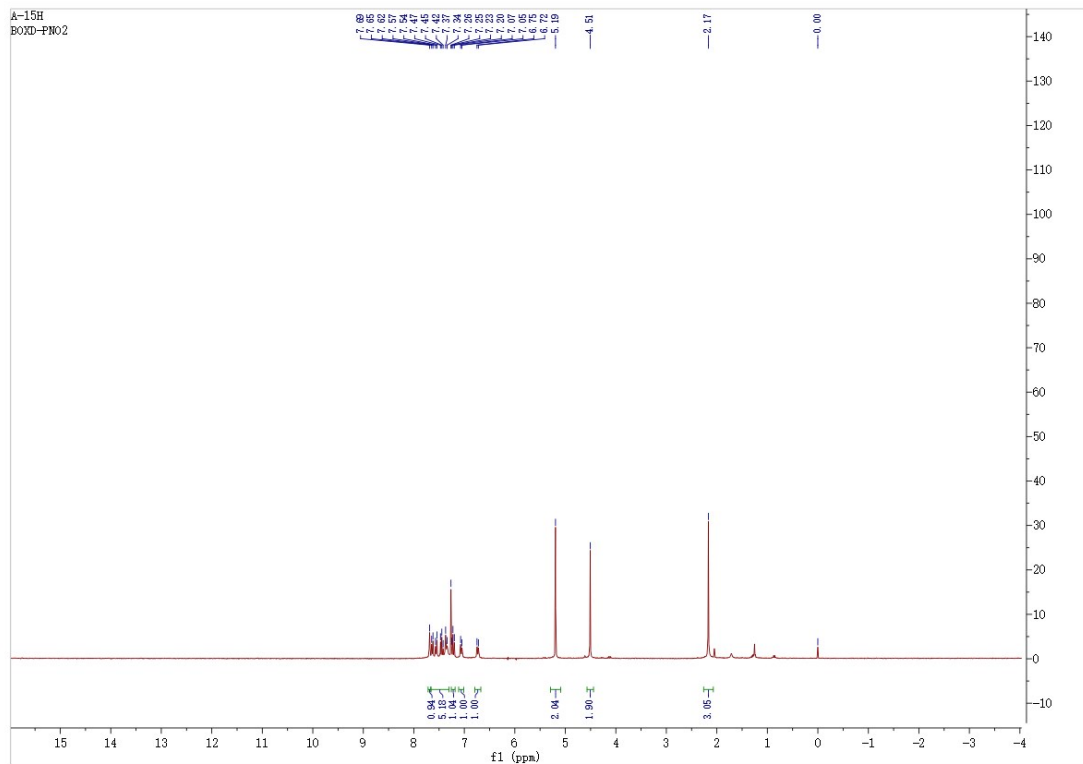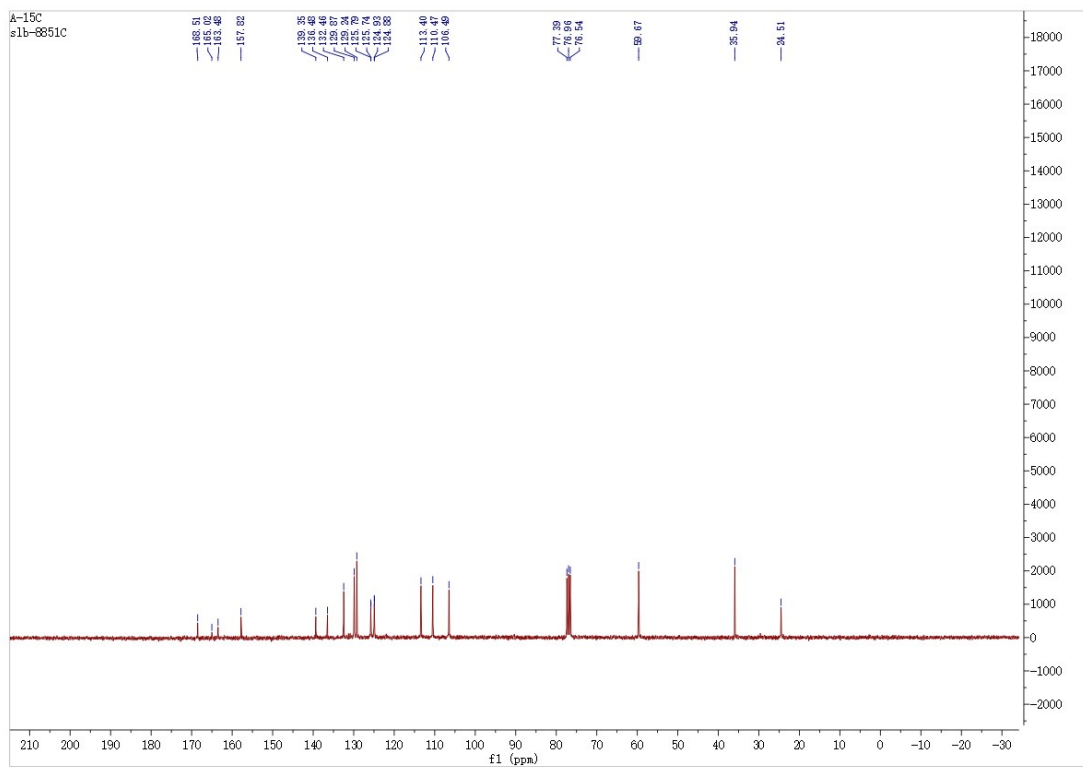

WSB-18\_200727142225 #13-23 RT: 0.06-0.11 AV: 11 NL: 4.03E9  
 T: FTMS + p ESI Full ms [100.0000-1000.0000]

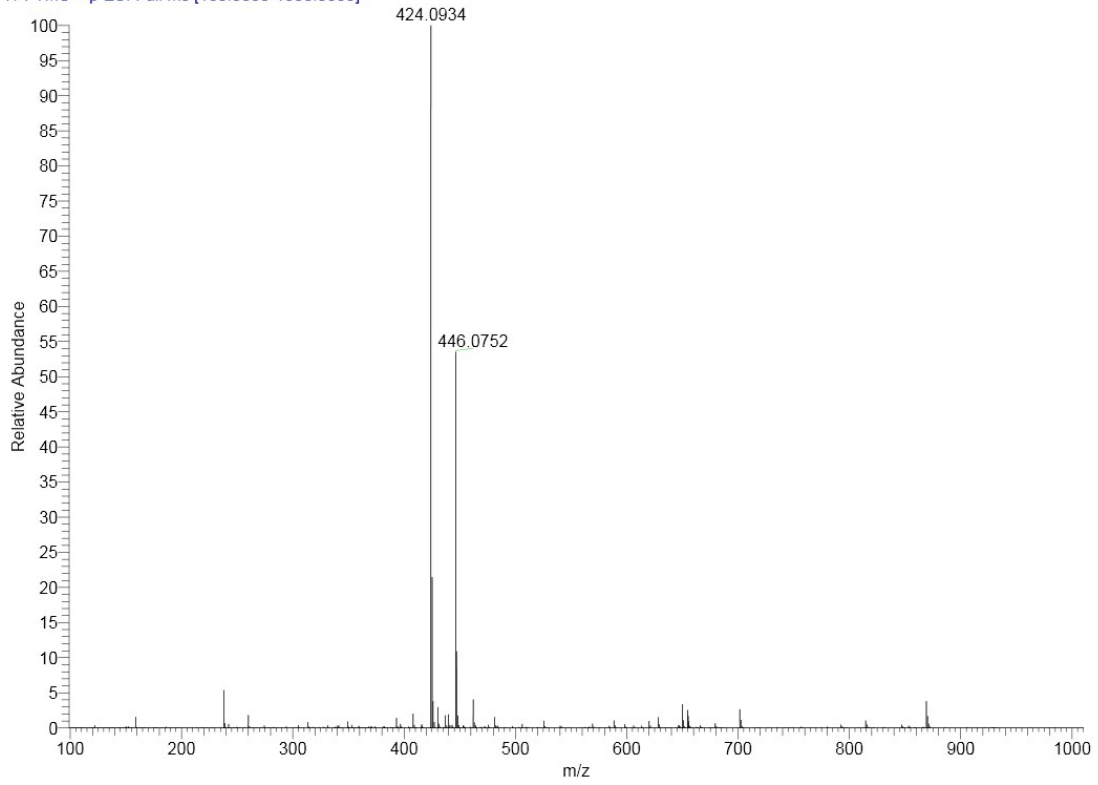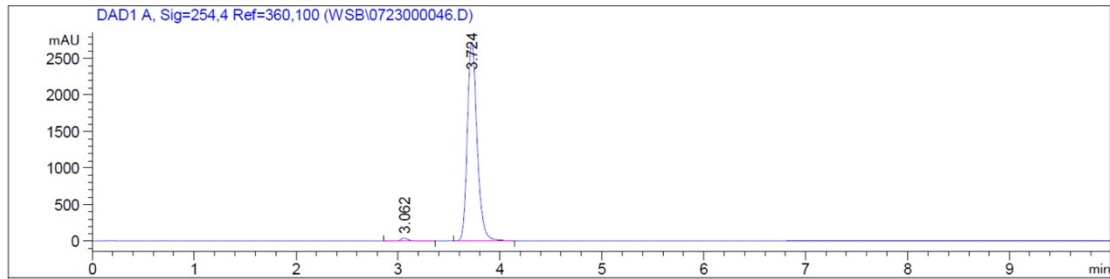

| 峰 # | 保留时间 [min] | 类型 | 峰宽 [min] | 峰面积 [mAU*s] | 峰高 [mAU]   | 峰面积 %   |
|-----|------------|----|----------|-------------|------------|---------|
| 1   | 3.062      | BB | 0.0858   | 218.00792   | 38.65459   | 1.1855  |
| 2   | 3.724      | VV | 0.1017   | 1.81711e4   | 2728.22437 | 98.8145 |

**N-(3-((5-((4-Trifluoromethylbenzyl)thio)-1,3,4-oxadiazol-2-yl)methoxy)phenyl)acetamide (10j)**

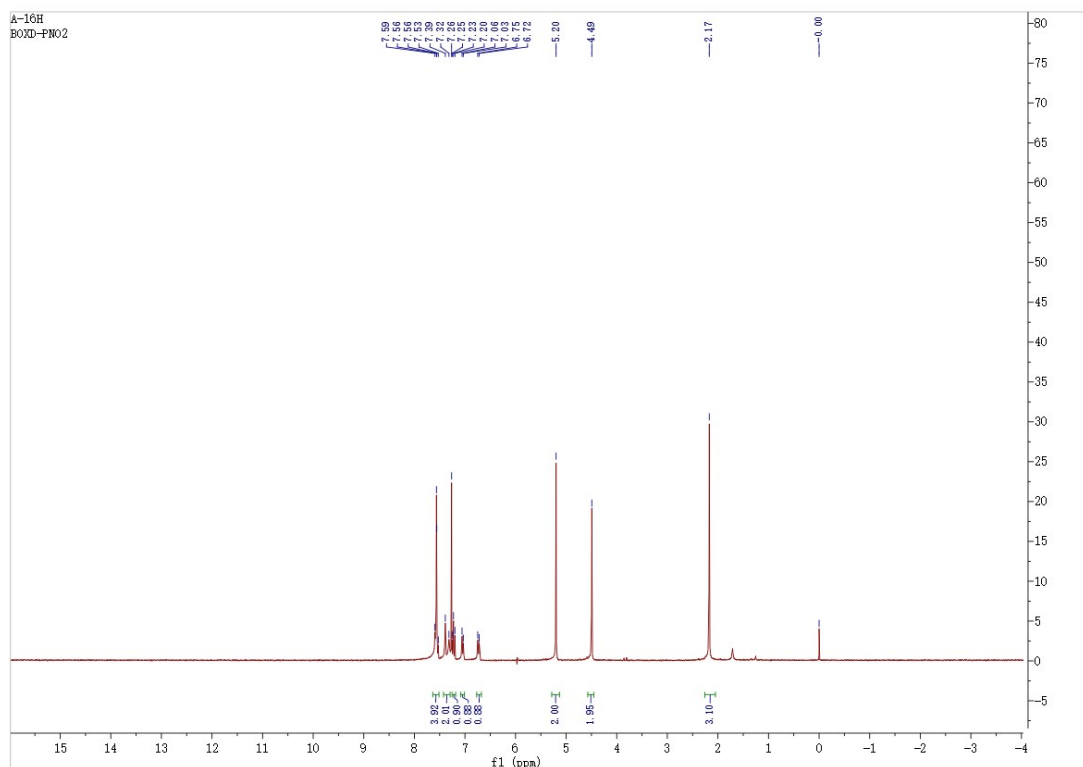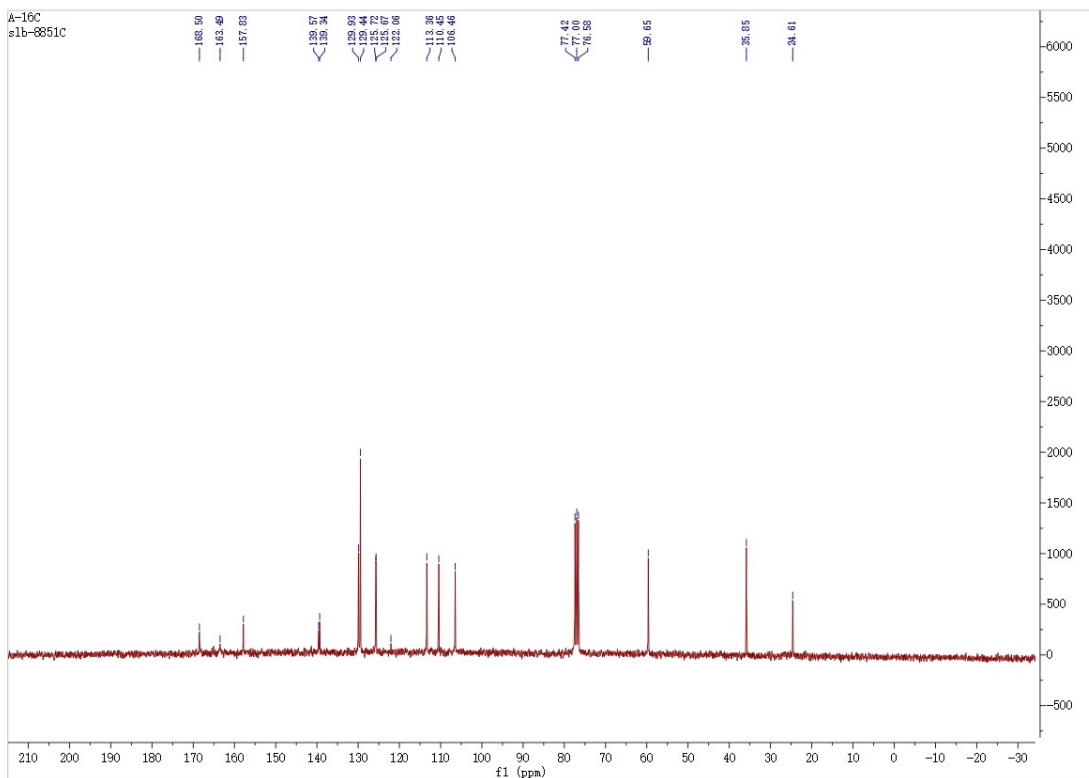

WSB-19\_200727142422 #22-25 RT: 0.10-0.11 AV: 4 NL: 3.04E9  
 T: FTMS + p ESI Full ms [100.0000-1000.0000]

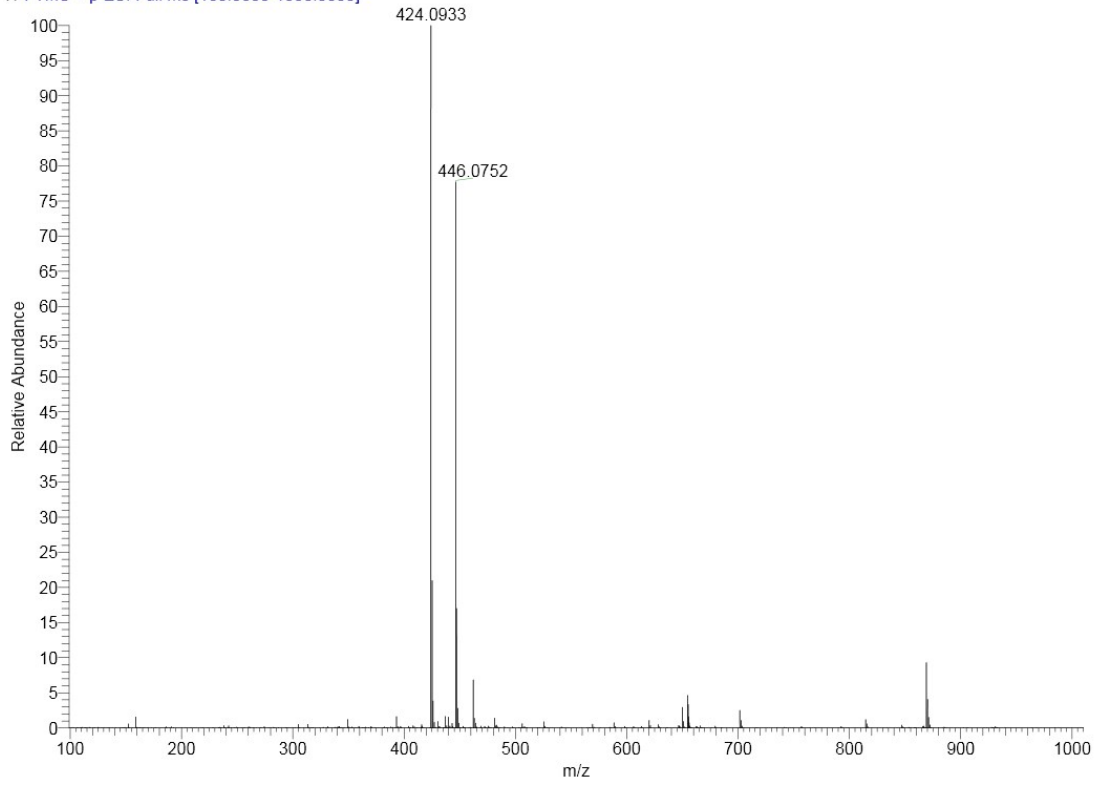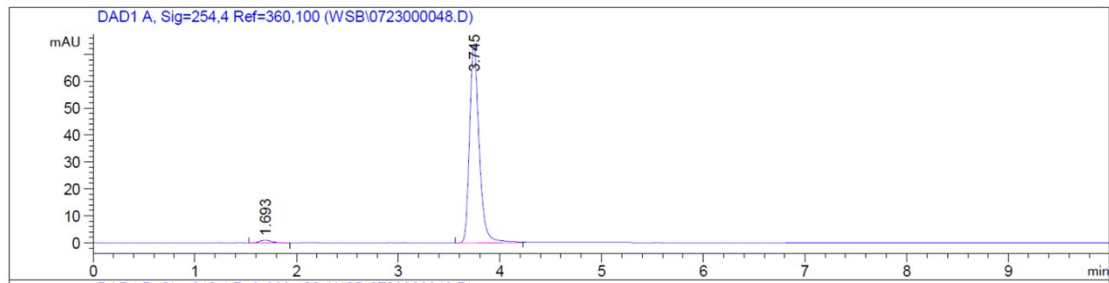

| 峰 # | 保留时间 [min] | 类型 | 峰宽 [min] | 峰面积 [mAU*s] | 峰高 [mAU]   | 峰面积 %   |
|-----|------------|----|----------|-------------|------------|---------|
| 1   | 1.693      | BB | 0.1274   | 8.11832     | 9.92953e-1 | 1.6542  |
| 2   | 3.745      | BV | 0.1002   | 482.64783   | 73.85669   | 98.3458 |



***N*-3-((5-((2-Methylbenzyl)thio)-1,3,4-oxadiazol-2-yl)methoxy)phenyl)acetamide (10k)**

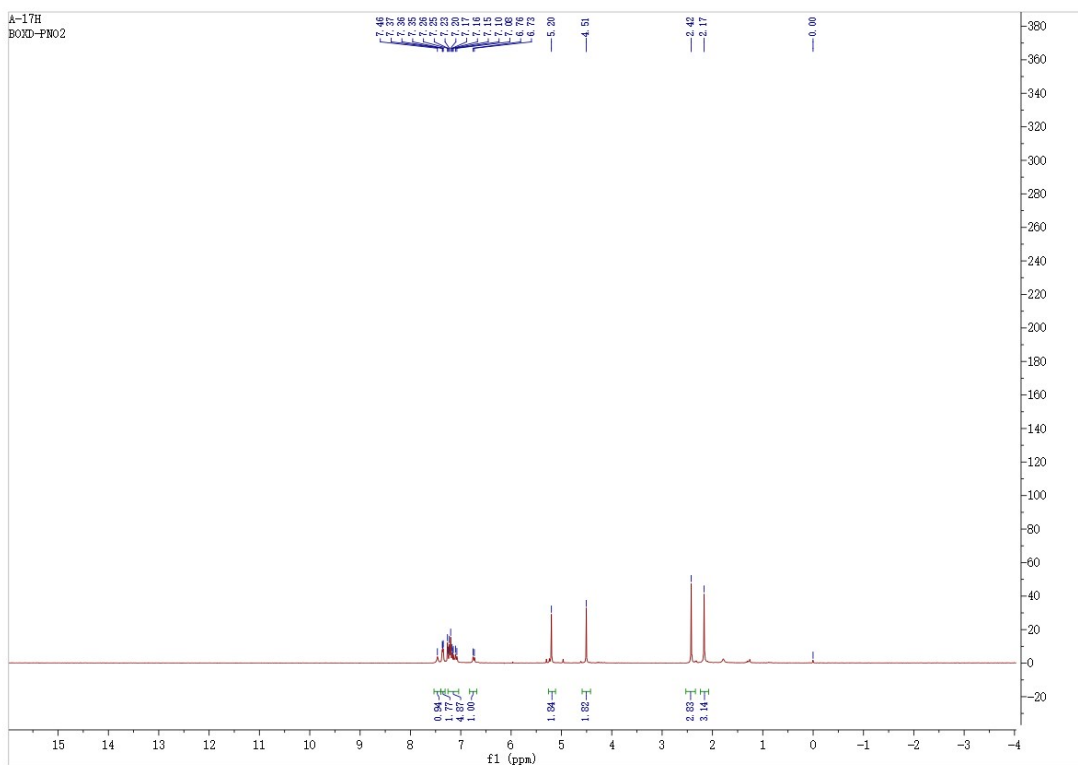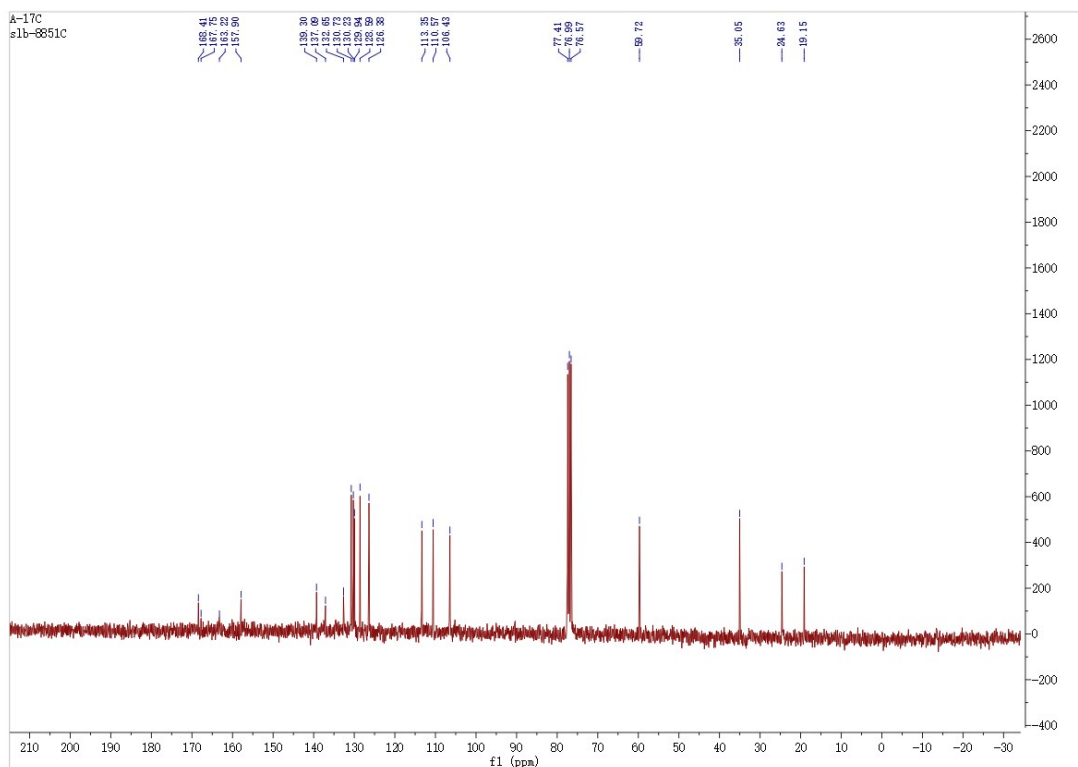

WSB-20 #13 RT: 0.06 AV: 1 NL: 9.22E9  
T: FTMS + p ESI Full ms [100.0000-1000.0000]

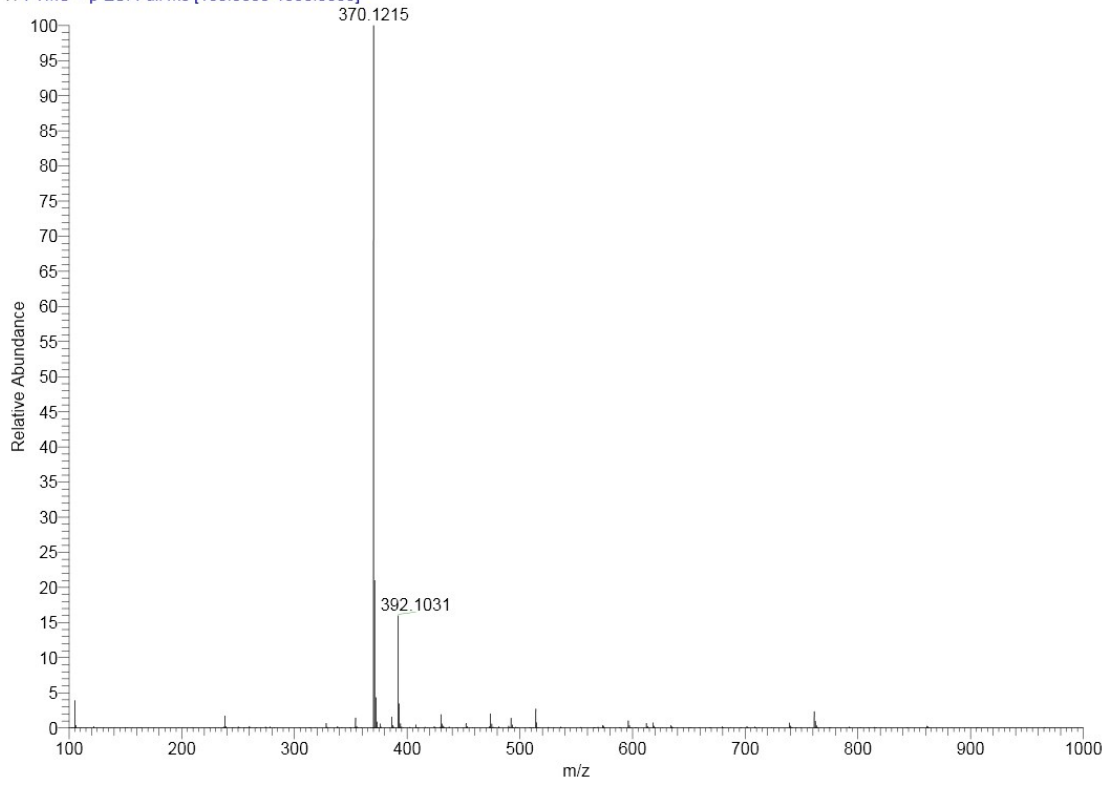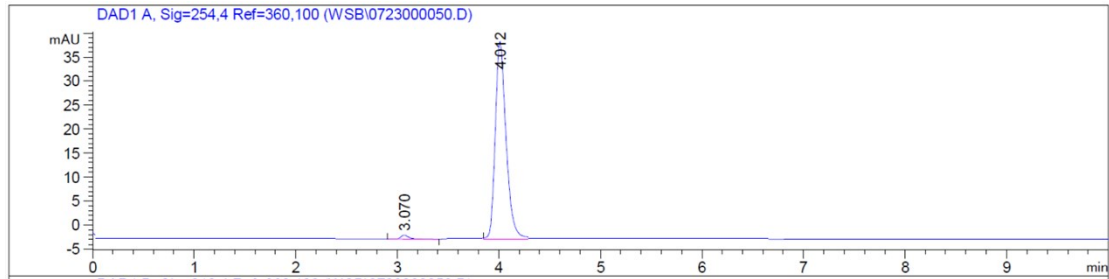

| 峰 # | 保留时间 [min] | 类型 | 峰宽 [min] | 峰面积 [mAU*s] | 峰高 [mAU]   | 峰面积 %   |
|-----|------------|----|----------|-------------|------------|---------|
| 1   | 3.070      | BB | 0.0836   | 4.67671     | 8.57661e-1 | 1.5225  |
| 2   | 4.012      | VV | 0.1118   | 302.48834   | 41.15192   | 98.4775 |

***N*-3-((5-((3-Methylbenzyl)thio)-1,3,4-oxadiazol-2-yl)methoxy)phenyl)acetamide (10l)**

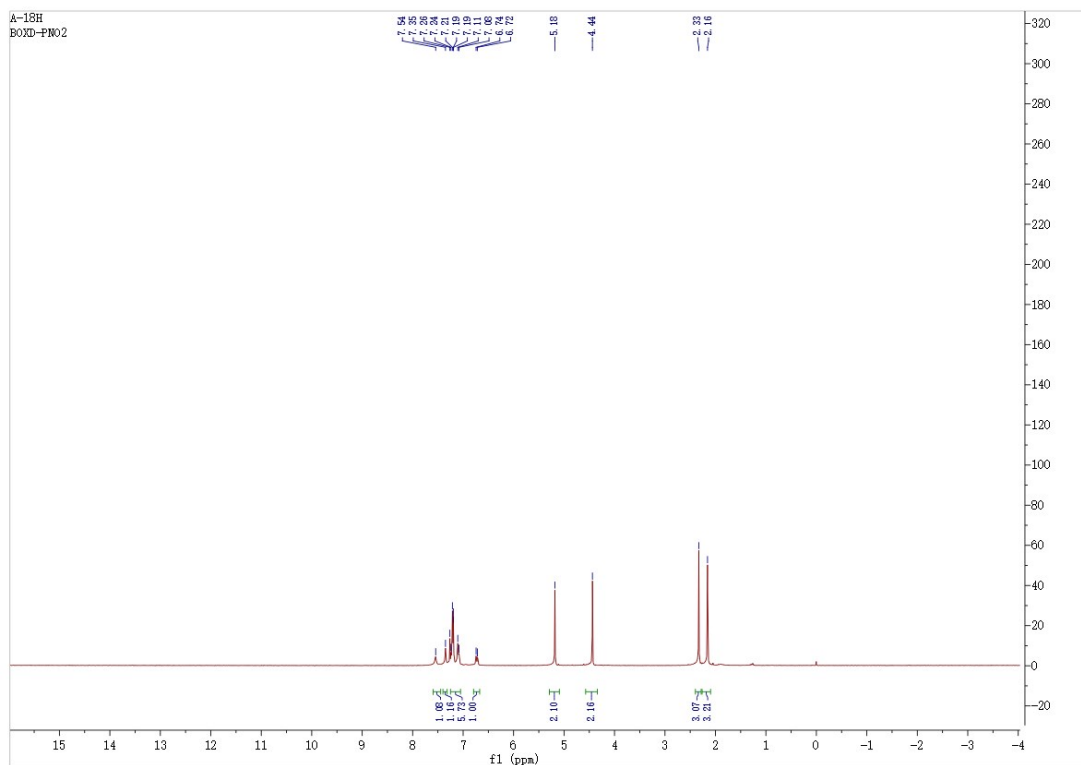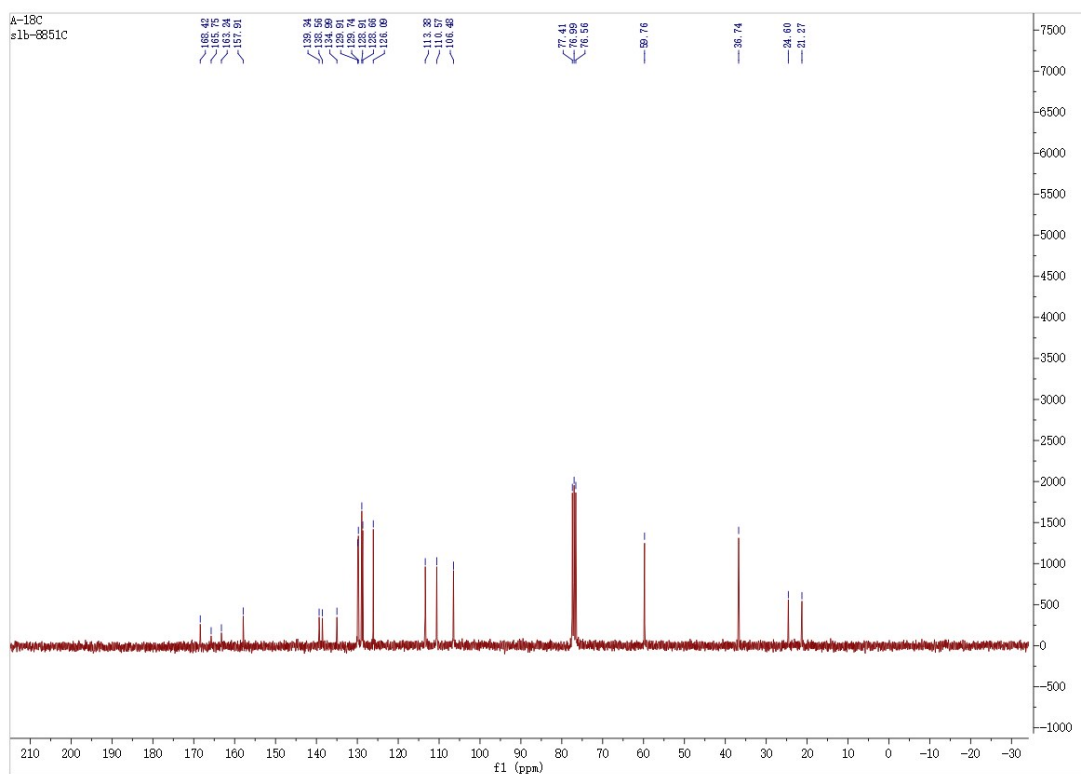

WSB-21 #21 RT: 0.10 AV: 1 NL: 7.49E9  
 T: FTMS + p ESI Full ms [100.0000-1000.0000]

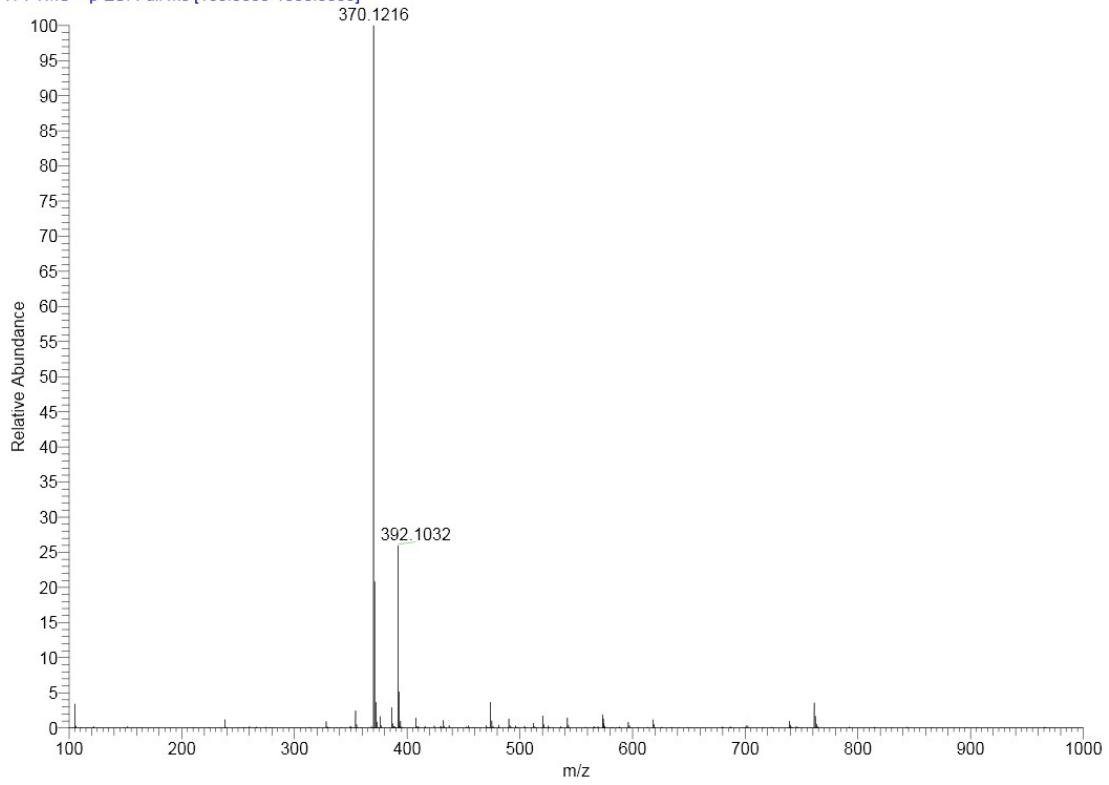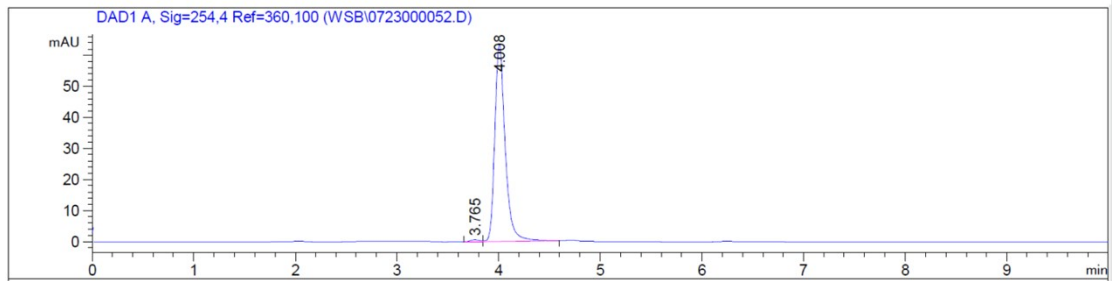

| 峰 # | 保留时间 [min] | 类型  | 峰宽 [min] | 峰面积 [mAU*s] | 峰高 [mAU]   | 峰面积 %   |
|-----|------------|-----|----------|-------------|------------|---------|
| 1   | 3.765      | BV  | 0.1028   | 3.94234     | 5.98952e-1 | 0.8634  |
| 2   | 4.008      | VBA | 0.1090   | 452.64636   | 63.59904   | 99.1366 |

***N*-3-((5-((4-Methylbenzyl)thio)-1,3,4-oxadiazol-2-yl)methoxy)phenyl)acetamide (10m)**

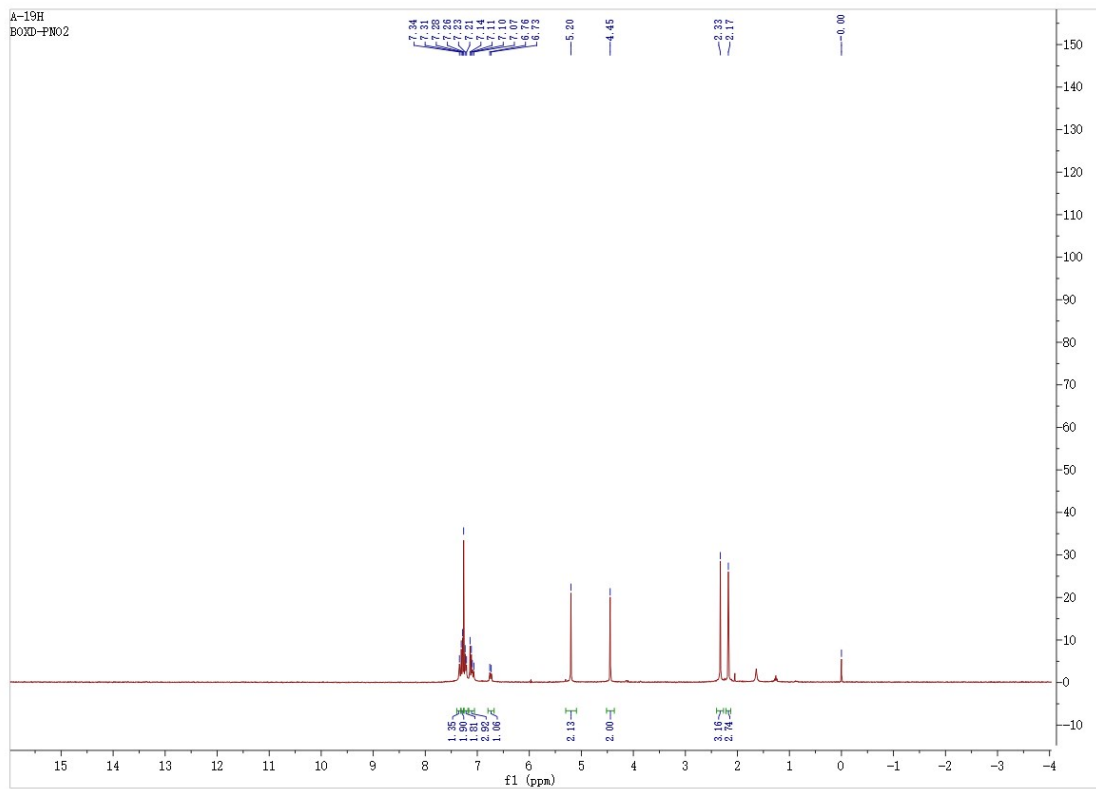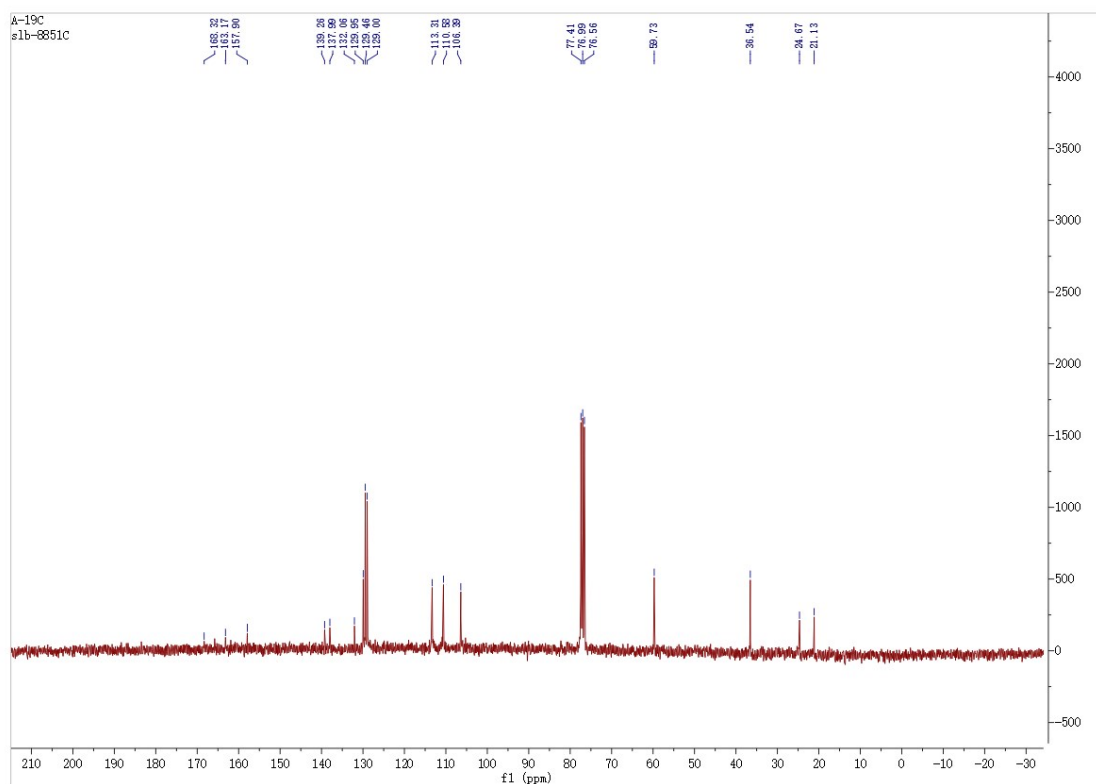

WSB-22 #18-21 RT: 0.08-0.10 AV: 4 NL: 8.55E9  
 T: FTMS + p ESI Full ms [100.0000-1000.0000]

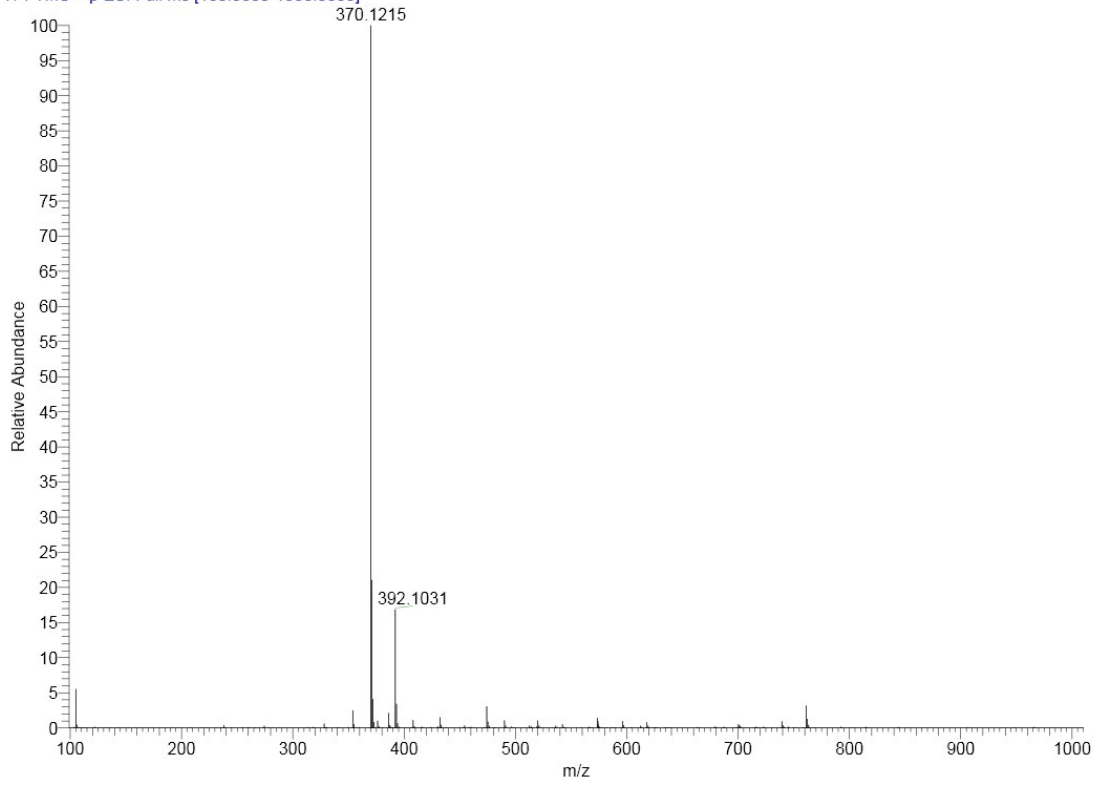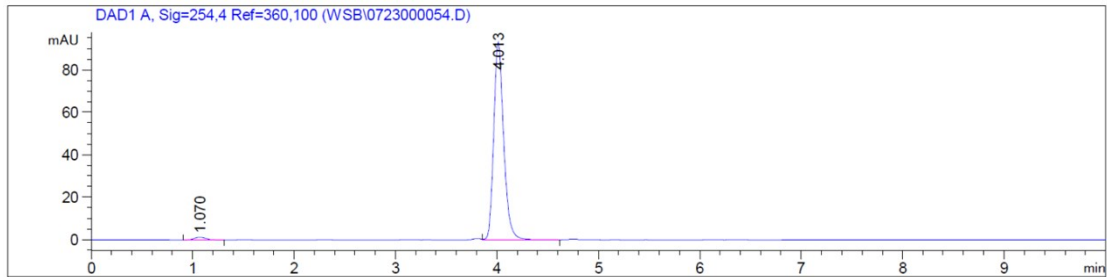

| 峰 # | 保留时间 [min] | 类型  | 峰宽 [min] | 峰面积 [mAU*s] | 峰高 [mAU] | 峰面积 %   |
|-----|------------|-----|----------|-------------|----------|---------|
| 1   | 1.070      | VV  | 0.1309   | 11.31917    | 1.33590  | 1.7495  |
| 2   | 4.013      | VBA | 0.1054   | 635.67169   | 93.41692 | 98.2505 |
